1 **B1a cells protect against *Schistosoma japonicum*–induced liver**  
2 **inflammation and fibrosis by controlling monocyte infiltration**

3 Liang Yong<sup>1,2</sup>, Yuanyuan Tang<sup>2</sup>, Cuiping Ren<sup>1,2</sup>, Miao Liu<sup>1,2</sup>, Jijia Shen<sup>1,2</sup>, Xin Hou<sup>1,2\*</sup>

4 <sup>1</sup> Anhui Provincial Laboratory of Microbiology and Parasitology, Anhui Medical  
5 University, Hefei, China.

6 <sup>2</sup> School of Basic Medical Sciences, Anhui Medical University, Hefei, China.

7 \*Corresponding author, Email: [houxin45@mail.ustc.edu.cn](mailto:houxin45@mail.ustc.edu.cn) (XH)

8

9 Short title: B1a cells regulate *S. japonicum*–induced liver inflammation and fibrosis

10

## 11 **Abstract**

12       During *Schistosoma* infection, lack of B cells results in more severe granulomas,  
13 inflammation, and fibrosis in the liver, but the mechanisms underlying this pathology  
14 remain unclear. Thus, our aim was to clarify the mechanisms underpinning the  
15 immunomodulation of B cells in mice infected with *Schistosoma japonicum*. We found  
16 that B cell deficiency led to aggravated liver pathology, as demonstrated by increases  
17 in the size of the egg-associated granulomas, alanine transaminase levels, and collagen  
18 deposition. Compared with infected wild-type mice, infected B cell-deficient  $\mu$ MT  
19 mice showed increased infiltration of Ly6C<sup>hi</sup> monocytes and higher levels of  
20 proinflammatory cytokines (tumor necrosis factor alpha, interleukin 6, and interleukin  
21 12) and chemokines ([C-C motif] ligands (CCL)2, CCL3, CCL4, and CCL5). The  
22 results of flow cytometric analysis and cell transfer experiments showed that B1a cells  
23 increased significantly in the liver following *S. japonicum* infection, with some of those  
24 cells deriving from the peritoneal cavity. We also found that secretion of IL-10 from  
25 hepatic B cells increased significantly in infected wild-type mice and that this IL-10  
26 was mainly derived from B1a cells. In addition, adoptively transferring peritoneal  
27 cavity B cells purified from wild-type, but not from IL-10-deficient mice, to  $\mu$ MT mice  
28 significantly reduced liver pathology and liver infiltration of Ly6C<sup>hi</sup> monocytes. These  
29 reductions were accompanied by decreases in the expression levels of chemokines and  
30 inflammatory cytokines. Taken together, these data indicated that after *S. japonicum*  
31 infection, an increased number of hepatic B1a cells secrete IL-10, which inhibits the  
32 expression of chemokines and cytokines and suppresses the infiltration of Ly6C<sup>hi</sup>

33 monocytes into the liver thereby alleviating liver early inflammation and late fibrosis.  
34 Understanding this immunomodulatory role of B1a cells in schistosomiasis may lead  
35 to the development of therapeutic strategies for *Schistosoma*-induced liver disease.

### 36 **Author summary**

37 Infection with *Schistosoma*, a waterborne parasitic flatworm (trematode)  
38 commonly called a blood fluke, results in strong granulomatous inflammation caused  
39 by the deposition of eggs in the liver. A granuloma is a substantial immune cell  
40 infiltration around the eggs intermixed with liver cells that can protect the host against  
41 liver damage. However, excessive infiltration and inflammation can lead to severe liver  
42 injury and fibrosis. Here, we found that B1a cells accumulate in the liver of mice after  
43 *S. japonicum*-induced infection and that these B1a cells release the anti-inflammatory  
44 cytokine interleukin 10 to regulate inflammation. The B1a cell-derived interleukin 10  
45 inhibits the expression of chemokines (which attract cells such as monocytes to sites of  
46 infection or inflammation) and thus restrains excessive infiltration of Ly6C<sup>hi</sup> monocytes  
47 (which may have proinflammatory activity) into the liver, thereby alleviating early  
48 inflammation and later fibrosis. Our study provides insight into the immunomodulation  
49 of B1a cells in schistosomiasis and offers key information for the development of  
50 therapeutic strategies in *Schistosoma*-induced liver disease.

### 51 **Introduction**

52 Schistosomiasis is a chronic disease with the characteristic pathological  
53 manifestation of granulomatous lesions around parasitic eggs deposited in the liver and  
54 intestine. Granulomas are driven by a type 2 immune response and are a critical

55 component in limiting the amount of tissue damage and preventing acute mortality [1].

56 However, granulomas may ultimately lead to liver fibrosis and sometimes to death in  
57 chronically infected hosts [2].

58 Macrophages are a major cellular component of granulomas. Both monocyte-  
59 derived and resident macrophages engage surrounding parasite eggs during infection  
60 [3, 4]. The recruitment of Ly6C<sup>hi</sup> monocytes is the dominant mechanism for expanding  
61 macrophage populations in the *Schistosoma*-infected liver [3]. Recruitment of Ly6C<sup>hi</sup>  
62 monocytes to inflammatory sites depends on the interactions between chemokine (C-C  
63 motif) ligands (CCLs) and their receptors (CCRs), including CCL2-CCR2, CCL1-  
64 CCR8, CCL3/4/5-CCR1/5, and CXCL10-CXCR3 interactions [5-8]. The number of  
65 Ly6C<sup>hi</sup> monocytes in the livers of *Schistosoma*-infected CCR2-deficient (*Ccr2*<sup>-/-</sup>) mice  
66 is significantly reduced compared with that in infected wild-type (WT) mice [3]. Liver  
67 recruitment of Ly6C<sup>hi</sup> monocytes has been documented in viral infection, sterile heat  
68 injury to the liver, and ischemia–reperfusion damage when Ly6C<sup>hi</sup> monocyte–derived  
69 macrophages have an M1 or proinflammatory phenotype and aggravate liver injury and  
70 fibrosis by releasing proinflammatory and profibrotic factors [9, 10]. In schistosomiasis,  
71 Ly6C<sup>hi</sup> monocytes in granulomas respond to T helper 2 (Th2)-cell derived interleukin  
72 (IL)-4 and IL-13 to exhibit an arginase 1–positive, resistin-like molecule alpha–positive  
73 and chitinase-like 3–positive M2 phenotype or an alternatively activated macrophage  
74 (AAM) phenotype [11]. Studies using animal models have indicated that AAMs are  
75 essential to prevent fatal intestinal damage and sepsis during acute schistosomiasis;  
76 however, AAMs can also produce a variety of factors to recruit and activate fibroblasts,

77 which contribute to the development of fibrosis [2, 12]. Depletion of macrophages/  
78 monocytes attenuates liver and lung granuloma formation and tissue fibrosis after  
79 *Schistosoma* infection [3, 13]. Thus, preventing excessive monocyte infiltration is  
80 important for tissue repair and host survival in chronic schistosomiasis. Nevertheless,  
81 despite the clear and well-documented roles of monocytes and macrophages in  
82 schistosomiasis, little is known about the mechanisms underlying regulation of  
83 monocyte infiltration.

84 Infection with *Schistosoma* induces IL-10-producing B cells, a relatively new  
85 member in the network of regulatory immune cells [14, 15]. *Schistosoma mansoni*-  
86 infected B cell-deficient  $\mu$ MT mice show more extensive hepatic granulomas and  
87 fibrosis than WT mice [16-18], but the mechanisms underpinning this difference are  
88 unclear. In mice, two major populations of B cells exist: B1 cells and B2 cells. On the  
89 basis of cluster of differentiation (CD)5 expression, B1 cells can be further subdivided  
90 into B1a (CD5<sup>+</sup>) and B1b (CD5<sup>-</sup>) subsets [19-21]. The B1 cells reside mainly in the  
91 peritoneal and pleural cavities, with low frequencies (<5%) in the spleen. The B1a cells  
92 spontaneously secrete natural IgM antibodies, which bind self-antigens, bacterial cell  
93 wall components, or viruses [22, 23]. The B1a cells also spontaneously secrete IL-10,  
94 which regulates acute and chronic inflammatory diseases [19]. In the present study, we  
95 investigated the cross talk between B1a cells and monocytes to understand their roles  
96 in the pathogenesis of schistosomiasis. By using a murine model of *Schistosoma*  
97 *japonicum* infection, we demonstrated that B1a cells suppress granulomatous  
98 inflammation and liver fibrosis by regulating Ly6C<sup>hi</sup> monocyte infiltration. We also

99 found that IL-10 was required for B1a cells to downregulate the expression of  
100 chemokines and cytokines that attract monocytes.

## 101 **Results**

### 102 **B cells protect against *S. japonicum*–induced liver pathology**

103 To assess the role of B cells in the liver pathology associated with schistosomiasis,  
104 we infected B cell–deficient ( $\mu$ MT) mice and WT mice with *S. japonicum* and harvested  
105 samples at the indicated times (Fig 1A). We found that the sizes of the hepatic  
106 granulomas after infection in  $\mu$ MT mice were greater than those in WT mice (Fig 1B  
107 and D). Liver fibrosis was measured using picrosirius red staining and hydroxyproline  
108 levels. The results showed that both the proportion of the collagen area and the hepatic  
109 hydroxyproline levels in  $\mu$ MT mice 8 weeks and 10 weeks after infection were  
110 increased compared with those in WT mice (Fig 1C, E and F), indicating that  $\mu$ MT  
111 mice exhibited increased hepatic fibrosis. In addition, serum alanine transaminase (ALT)  
112 levels were significantly higher in  $\mu$ MT mice 6 weeks after infection (Fig 1G),  
113 suggesting that liver injury is more severe in  $\mu$ MT mice than in WT mice. The more  
114 severe liver pathology in  $\mu$ MT mice was not due to an increased burden of infection  
115 because the numbers of eggs observed in the liver samples did not differ significantly  
116 between  $\mu$ MT mice and WT mice (S1 Fig). Together, these data reveal an important  
117 role for B cells in attenuating *S. japonicum* egg-induced granuloma formation, hepatic  
118 injury, and hepatic fibrosis.

### 119 **B cells regulate the recruitment of monocytes in the liver**

120 To further analyze the cellular components in the granulomas, we isolated hepatic

121 leukocytes and used flow cytometry to detect cell phenotypes. The results showed that  
122 compared with those of WT mice the numbers of leukocytes (CD45<sup>+</sup>) and total  
123 macrophages (CD11b<sup>+</sup>F4/80<sup>+</sup>) were markedly increased in  $\mu$ MT mice during all stages  
124 of infection. The numbers of neutrophils (CD11b<sup>+</sup>Ly6G<sup>+</sup>), and of natural killer T (NKT)  
125 cells (CD3<sup>+</sup>NK1.1<sup>+</sup>), were modestly but significantly increased in  $\mu$ MT mice 8 weeks  
126 after infection, while the numbers of T cells (CD3<sup>+</sup>NK1.1<sup>-</sup>) and NK cells (CD3<sup>-</sup>NK1.1<sup>+</sup>)  
127 showed no significant changes between WT mice and  $\mu$ MT mice (Fig 2).

128 Hepatic macrophages consist of distinct populations termed resident Kupffer cells  
129 and monocyte-derived macrophages (MoMFs). The MoMFs can be further identified  
130 as two distinct subsets: proinflammatory Ly6C<sup>hi</sup> MoMFs and restorative Ly6C<sup>lo</sup>  
131 MoMFs [24]. In the present study, we found that a larger number of proinflammatory  
132 Ly6C<sup>hi</sup> monocytes infiltrated the liver in  $\mu$ MT mice than in WT mice 6 weeks after  
133 infection. By contrast, the numbers of Kupffer cells and Ly6C<sup>lo</sup> MoMFs were similar  
134 in  $\mu$ MT mice and WT mice (Fig 3).

135 We hypothesized that the increased macrophage number in the liver of  $\mu$ MT mice  
136 after infection reflects either enhanced monocyte production or increased monocyte  
137 recruitment. Because Ly6C<sup>hi</sup> monocytes are derived from the bone marrow and  
138 circulate in the blood [25], we analyzed Ly6C<sup>hi</sup> monocytes in the peripheral blood. We  
139 found no significant difference in the number of circulating Ly6C<sup>hi</sup> monocytes after  
140 infection, despite somewhat higher counts in uninfected naïve  $\mu$ MT mice, which  
141 suggests that monocyte production does not account for the increased monocyte number  
142 in the liver of  $\mu$ MT mice (S2 Fig). To evaluate recruitment, we used quantitative

143 polymerase chain reaction (PCR) assays to examine the gene expression levels of  
144 chemokines that attract monocytes in the liver samples of WT mice and  $\mu$ MT mice 6  
145 weeks after infection. The expression levels of *Ccl1*, *Ccl2*, *Ccl3*, *Ccl4*, and *Ccl5* were  
146 higher in the liver of  $\mu$ MT mice than in WT mice (Fig 4A). We also detected the protein  
147 levels of some key chemokines. The protein levels of CCL2, CCL3, CCL4, and CCL5  
148 in the liver of  $\mu$ MT mice were significantly increased compared with those of WT mice  
149 (Fig 4B). These data suggest that mobilization and recruitment, rather than production,  
150 accounted for differences in monocyte infiltration. Therefore, B cells limit monocyte  
151 influx by suppressing the expression of chemokines during the acute stage of *S.*  
152 *japonicum* infection.

153 Ly6C<sup>hi</sup> MoMFs preferentially express inflammatory cytokines [26]. Thus, we  
154 compared the expression of selected cytokines in the livers of  $\mu$ MT mice and WT mice  
155 after *S. japonicum* infection. The gene expression levels of *Tnfa* and *Il12b* and the  
156 protein levels of IL-6 in the livers of  $\mu$ MT mice were significantly higher than those in  
157 WT mice (Fig 4). In addition, serum protein levels of CCL3 and CCL5 in  $\mu$ MT mice  
158 were lower than those in WT mice (S3 Fig).

### 159 **B1a cells migrate from the peritoneal cavity (PC) to the liver after infection**

160 To investigate the role and mechanism of B cell action in this murine model, we  
161 first determined the number of total B cells in the liver during infection. We found that  
162 the B cell number was significantly increased 6 weeks after infection in WT mice (Fig  
163 5A). Further analysis of hepatic B cell subsets showed that both the percentage and  
164 number of hepatic B1a cells were markedly increased 6 weeks after infection, and the



165 numbers of B1b cells and B2 cells were also increased (Fig 5B, 5C, and S4 Fig). In  
166 addition, we found that both the percentage and number of PC B1a cells were markedly  
167 decreased 6 weeks after infection, whereas the percentage and number of PC B2 cells  
168 were increased (Fig 5D and E). These data suggest that the increased B1 cells in the  
169 liver after infection were recruited from the PC. To provide further support for this  
170 finding, we conducted adoptive cell transfer experiments. B cell-deficient  $\mu$ MT mice  
171 were infected with *S. japonicum* and then were intraperitoneally injected with  
172 uninfected WT mice-derived PC B cells or phosphate-buffered saline (PBS) 4 weeks  
173 after infection. Samples were harvested 6 weeks after infection (Fig 6A). The purity of  
174 WT mice-derived PC B cells was more than 95% (Fig 6B). After the cell transfer, B  
175 cell subsets could be detected in the PC and liver of  $\mu$ MT mice. Compared with those  
176 in donor WT mice, the percentage of B1a cells in the PC was lower in the recipient  
177  $\mu$ MT mice, whereas the percentage of B1a cells in the liver was higher, which was  
178 consist with our observations in the infected WT mice (Fig 6C-F).

179 **IL-10 is indispensable for B cell protection against *S. japonicum* infection-induced**  
180 **liver pathology**

181 The regulatory function of B cells is mediated mainly by their secretion of IL-10  
182 [21, 27-30]. To determine whether B cells protect against *S. japonicum* infection-  
183 induced liver pathology via IL-10, we first examined IL-10 expression in the liver and  
184 B cells. The hepatic IL-10 protein levels in  $\mu$ MT mice were significantly lower than  
185 those of WT mice 6 weeks after infection (Fig 7B), suggesting that B cells contribute  
186 to IL-10 production in the liver after infection. Our data also showed that IL-10

187 expression levels in B cells were increased after infection (Fig 7C, D), especially in  
188 hepatic B1a cells (Fig 7E).

189 IL-10 plays a protective immunomodulatory role during schistosomiasis [16]. To  
190 assess whether IL-10 is involved in the suppressive effect of B cells on monocyte  
191 infiltration after *S. japonicum* infection, we adoptively transferred PC B cells from WT  
192 or *Il10*<sup>-/-</sup> mice into *S. japonicum*-infected  $\mu$ MT mice. As expected, the  $\mu$ MT mice that  
193 received WT B cells showed decreases in the granuloma sizes, ALT levels, numbers of  
194 Kupffer cells and Ly6C<sup>hi</sup>/Ly6C<sup>lo</sup> MoMFs, and the expression levels of hepatic  
195 chemokines and inflammatory cytokines compared with those in control mice receiving  
196 PBS (Fig 8A-G). However, when  $\mu$ MT mice received the IL-10-deficient B cells, the  
197 granuloma sizes, numbers of Kupffer cells and Ly6C<sup>hi</sup>/Ly6C<sup>lo</sup> MoMFs, and expression  
198 levels of chemokines and inflammatory cytokines in the liver were not reduced  
199 compared with those in controls (Fig 8A, B, and E-G). Only the ALT levels in  $\mu$ MT  
200 mice receiving the transfer of IL-10-deficient B cells were decreased (Fig 8C).  
201 Collectively, these results provide evidence that the B1a regulatory subset of B cells  
202 suppress monocyte recruitment by producing IL-10 to thereby attenuate *S. japonicum*  
203 egg-induced liver pathology.

## 204 **Discussion**

205 The roles of B cells in liver fibrosis remain obscure. In carbon tetrachloride (CCl<sub>4</sub>)-  
206 induced liver fibrosis, B cells are required for the fibrotic processes. In the CCl<sub>4</sub> model,  
207 B cells serve to amplify liver fibrosis through the production of proinflammatory  
208 cytokines and chemokines [31, 32]. However, the observed mechanisms in the CCl<sub>4</sub>

209 model are not applicable to infectious liver fibrosis. The B cell-deficient mouse  
210 displays an increased hepatic fibrosis after *Schistosoma mansoni* infection, suggesting  
211 that B cells serve a protective role in infection-induced liver fibrosis. The mechanisms  
212 underlying B cell suppression of *Schistosoma*-induced liver fibrosis had been  
213 previously unknown. However, in the present study using an *S. japonicum*-infected  
214 murine model, we found that B1 cells protected against *S. japonicum* infection-induced  
215 liver pathology by controlling liver infiltration of monocytes. In agreement with the  
216 reports using the *S. mansoni* infection model [16, 17], we observed markedly  
217 exacerbated hepatic granuloma formation, liver injury, and fibrosis in *S. japonicum*-  
218 infected B cell-deficient ( $\mu$ MT) mice. The B1a cells trafficked from the peritoneal  
219 cavity to the liver following infection induction. The increased B1a cells in the liver  
220 suppressed the production of chemokines, which attract monocytes, and thus controlled  
221 the recruitment of monocytes. The B1a cells played their regulatory roles via producing  
222 IL-10 (Fig 9).

223 Infiltrating Ly6C<sup>hi</sup> monocytes may act as a double-edged sword in liver damage.  
224 These cells express a substantial number of inflammatory cytokines and chemokines  
225 and promote liver inflammation, injury, and fibrosis in the initiation and progression of  
226 various types of liver injury, including acute viral infection, hepatotoxicity following  
227 CCl<sub>4</sub> treatment, or ischemia-reperfusion damage [24, 33, 34]. We hypothesized that  
228 recruited Ly6C<sup>hi</sup> monocytes also contribute to the initial liver damage and development  
229 of fibrosis after *S. japonicum* infection. As expected, *S. japonicum*-infected  $\mu$ MT mice  
230 with increased Ly6C<sup>hi</sup> monocyte infiltration had higher levels of ALT and liver fibrosis

231 than WT mice (Fig 1 and 3). When liver injury ceases, inflammatory Ly6C<sup>hi</sup> monocytes  
232 mature into Ly6C<sup>lo</sup> restorative macrophages, which display increased expression of  
233 anti-inflammatory cytokines, regenerative growth factors, and matrix degrading  
234 metalloproteinase [9, 25]. During chronic *S. mansoni* infection, Ly6C<sup>hi</sup> monocytes  
235 become AAMs in granulomas through a Ly6C<sup>lo</sup> state [3, 4]. The arginase 1–expressing  
236 AAM population suppresses Th2 cytokine-driven inflammation and fibrosis in  
237 schistosomiasis [35, 36]. Thus, it is crucial to regulate monocyte recruitment and  
238 homeostasis in the liver. Our results showed that compared with WT mice,  $\mu$ MT mice  
239 had increased hepatic Ly6C<sup>hi</sup> MoMFs and chemokines attracting Ly6C<sup>hi</sup> monocytes  
240 after *S. japonicum* infection (Fig 3 and 4), which suggests that B cells play critical roles  
241 in controlling monocyte infiltration after *S. japonicum* infection through negative  
242 regulation of chemokines.

243 Schistosoma infection induces IL-10–producing B cells, which are termed  
244 regulatory B cells or B10 cells [27, 30]. Currently, there are no phenotypic, transcription  
245 factors, or lineage markers that are unique to B10 cells, and B10 cells mostly overlap  
246 with B1 cells [19, 21, 28]. B1 cells can secrete IL-10 to mediate the negative regulation  
247 of inflammation, including restricting the production of proinflammatory cytokines,  
248 downregulating the expression of major histocompatibility complex class II [37], and  
249 maintaining the suppressive function of regulatory T cells [38]. In homeostatic  
250 conditions, B1a cells are localized mainly in the PC, and they are the major population  
251 of B cells in this compartment. In response to pathogens, serosal B1a cells in body  
252 cavities migrate to neighboring lymphoid sites or tissues [19, 39]. In the present study,

253 we found that B1 cells, especially B1a cells, migrated from the PC to the liver after *S.*  
254 *japonicum* infection, which was shown by the increased percentage and number of B1a  
255 cells in the liver and their concurrent decrease in the PC after infection (Fig 5). In  
256 addition, *S. japonicum*-infected  $\mu$ MT mice receiving the adoptive transfer of PC B cells  
257 purified from WT mice also showed a higher percentage of B1a cells in the liver and a  
258 lower percentage of B1a cells in the PC than the donor mice (Fig 6). These data suggest  
259 that B1a cells are the major population of B cells that regulate monocyte infiltration  
260 after *S. japonicum* infection.

261 IL-10 is involved in the immunoregulatory role of B1a cells [19]. It has been  
262 reported that IL-10 plays an antifibrotic role via inhibiting the proliferation and collagen  
263 synthesis of myofibroblasts [40]. Recently, a connection between IL-10 and  
264 inflammatory chemokines has been suggested in renal fibrosis and nerve injury. After  
265 the onset of unilateral ureteral obstruction, IL-10 knockout mice show increased  
266 infiltration of inflammatory cells and cytokines, including monocyte chemoattractant  
267 protein-1, TNF- $\alpha$ , IL-6, IL-8, RANTES, or macrophage colony-stimulating factor, in  
268 the kidney compared with WT controls [41]. After peripheral nerve injury, IL-10 plays  
269 a role in controlling the early influx and the later efflux of macrophages out of the nerve  
270 via downregulating expression of proinflammatory chemokines and cytokines [42]. In  
271 the present study, we observed an increased expression of IL-10 in B cells. Our flow  
272 cytometric analysis indicated that B1a cells are the major population of B cells  
273 expressing IL-10 in the *S. japonicum*-infected liver (Fig 7). We also found that in the  
274 absence of IL-10, the transferred PC B cells were unable to downregulate granuloma

275 inflammation, recruitment of monocytes, or the expression of a number of  
276 proinflammatory chemokines and cytokines in the infected  $\mu$ MT mice (Fig 8). These  
277 data suggest that after *S. japonicum* infection, B cells control the recruitment of  
278 monocytes and the expression of proinflammatory chemokines and cytokines via IL-10  
279 production.

280 The cross talk between B cells and monocytes observed in our study appears to be  
281 opposite to that observed in CCl<sub>4</sub>-induced fibrosis [31]. The difference may be that  
282 different liver microenvironments induce different B cell subsets in these two models.  
283 In the CCl<sub>4</sub> model, the increased B cells in the liver produce IgG and express CD138,  
284 which may be a B2 subset. The B cells in the CCl<sub>4</sub> model secrete proinflammatory  
285 cytokines and chemokines, hence, they recruit dendritic cells and Ly6C<sup>++</sup> monocytes.  
286 In the present model, the B1a cells were the most substantially increased B cell subset  
287 in the *S. japonicum*-infected liver. These B1a cells produced IL-10, which led to the  
288 suppressed recruitment of Ly6C<sup>hi</sup> monocytes.

289 In conclusion, our data indicated that PC B1a cells infiltrate the liver when it is  
290 damaged through *S. japonicum* infection. These B1a cells secrete IL-10, which inhibits  
291 expression of CCL2, CCL4, and CCL5 to limit excessive liver infiltration of Ly6C<sup>hi</sup>  
292 monocytes and thereby alleviate early inflammation and later liver fibrosis.

## 293 **Materials and methods**

### 294 **Ethics statement**

295 All animal experiments were approved by the Institutional Animal Care and Use  
296 Committee at Anhui Medical University (the approved number is LLSC20150279) and

297 conformed to the guidelines outlined in the Guide for the Care and Use of Laboratory  
298 Animals.

### 299 **Mice and parasites**

300 The 8- to 10-week-old male C57BL/6 WT mice and B cell-deficient ( $\mu$ MT) mice  
301 on a C57BL/6 background were purchased from the Nanjing Biomedical Research  
302 Institute of Nanjing University (Nanjing, China). The *Il10<sup>-/-</sup>* mice on a C57BL/6  
303 background were provided by Professor Zhigang Tian (University of Science and  
304 Technology of China). All mice were kept under temperature- and humidity-controlled  
305 specific-pathogen-free conditions. For infection, mice were anesthetized and  
306 percutaneously exposed to 18–20 cercariae of *S. japonicum* (a Chinese mainland strain)  
307 that were obtained from infected *Oncomelania hupensis* snails. At the indicated times,  
308 mice were euthanized and tissue samples were harvested for later experiments.

### 309 **Egg counts**

310 A portion of the liver tissue was digested in 10% potassium hydroxide at 37°C for  
311 3 h. The eggs in aliquots of the suspensions were counted under a microscope.

### 312 **Cell isolation**

313 For isolation of peripheral leukocytes, blood samples were incubated with ACK  
314 (Ammonium-Chloride-Potassium) Lysis Buffer (Gibco™) on ice for 10 min to remove  
315 red blood cells. After being neutralized and washed, the pellets were resuspended with  
316 PBS.

317 For isolation of PC cells, the outer layer of the peritoneum was opened. A needle  
318 was inserted into the inner layer of the peritoneum to avoid puncture of organs. Ice-

319 cold PBS (5 mL) containing 2% bovine serum albumin was injected into the PC and  
320 the PC was washed repeatedly. The collected cell suspension was centrifuged at  $500 \times$   
321  $g$  for 10 min, and the pellets were resuspended with PBS.

322 For isolation of hepatic leukocytes, liver samples were cut and incubated in  
323 Dulbecco's modified Eagle's medium (DMEM) containing 0.05% collagenase IV  
324 (Sigma), 0.002% DNase I (Sangon Biotech Co. Ltd.) and 10 mM HEPES at 37°C for  
325 40 min. The digested liver tissue was passed through nylon mesh (74  $\mu$ m), and the  
326 enzymes were inactivated by adding additional DMEM. After centrifugation at  $50 \times g$   
327 twice for 2 min to remove the hepatocyte pellet, the supernatant was centrifuged at  $500$   
328  $\times g$  for 10 min. The pellets were resuspended in 40% Percoll (GE Healthcare) and  
329 centrifuged at  $1260 \times g$  for 20 min. The resulting pellets were incubated for 5 min on  
330 ice with ACK Lysis Buffer and resuspended with PBS.

331 All single-cell suspensions were washed and counted. Cell viability was confirmed  
332 using the standard trypan blue exclusion method.

333 Liver and PC CD19<sup>+</sup> B cells were sorted by PE-CD19 and anti-PE microbeads  
334 using a magnetic affinity cell sorting (MACS) system (Miltenyi Biotec), and the purity  
335 was >90%.

### 336 **Adoptive transfer of PC B cells**

337 MACS-sorted uninfected WT or *III0<sup>-/-</sup>* mouse-derived PC B cells ( $2 \times 10^6$ ) or PBS  
338 was intraperitoneally injected into each recipient  $\mu$ MT mouse 4 weeks post infection.

### 339 **Flow cytometry**

340 The following fluorochrome-conjugated monoclonal antibodies were used in this



341 study: antimouse CD3, CD5, CD11b, CD19, CD23, CD45, CD115, F4/80, Ly6C, Ly6G,  
342 NK1.1, IgM, IgD (all from BioLegend, San Diego, CA), IL-10 (BD Pharmingen). The  
343 cells ( $1 \times 10^6$ ) were blocked with FcR blocker (BD Pharmingen) and then incubated with  
344 monoclonal antibodies to surface antigens.

345 To detect the secretion of IL-10, cells ( $1 \times 10^6$ ) were stimulated with phorbol  
346 myristate acetate (30 ng/mL), ionomycin (1  $\mu$ g/mL) (Sigma, St. Louis, Mo.), monensin  
347 (5  $\mu$ g/mL) (Sigma, St. Louis, Mo.), and lipopolysaccharide (10  $\mu$ g/mL) (Sigma, St.  
348 Louis, Mo.) for 4 h. Cells were incubated with monoclonal antibodies to surface  
349 antigens and then fixed and permeabilized using a Transcription Factor Staining Buffer  
350 Set (eBioscience, San Diego, CA). The cells were then incubated with antibodies to IL-  
351 10. All samples were analyzed using flow cytometry (FACSVerse system, BD  
352 Biosciences) with FlowJo (version 7.6.1) software.

### 353 **RNA isolation and quantitative PCR**

354 Total hepatic RNA was isolated from frozen liver tissue using Trizol (Invitrogen).  
355 The MACS-sorted hepatic B cells were resuspended in Trizol, and the RNA was  
356 isolated according to the manufacturer's instructions. First strand cDNA was  
357 synthesized from  $\leq 500$  ng of RNA using a PrimeScript RT reagent kit (TaKaRa).  
358 Quantitative PCR was performed with a StepOnePlus Real-Time PCR System (Applied  
359 Biosystems, Foster City, CA) using SYBR Premix Ex Taq II (TaKaRa). The expression  
360 levels of target genes were normalized to the housekeeping gene *Actb*. Relative  
361 expression was calculated by the  $2^{-\Delta\Delta C_t}$  method. The primers used are given in Table 1.

### 362 **Table 1. Sequences of primers**

| <b>Gene</b>  | <b>Forward primer (5'–3')</b> | <b>Reverse primer (5'–3')</b> |
|--------------|-------------------------------|-------------------------------|
| <i>Actb</i>  | AGAGGGAAATCGTGCGTGAC          | CAATAGTGATGACCTGGCCGT         |
| <i>Tnfa</i>  | ACTGGCAGAAGAGGCACTC           | CTGGCACCCTAGTTGGTTG           |
| <i>Il1b</i>  | CTGAACTCAACTGTGAAATGC         | TGATGTGCTGCTGCGAGA            |
| <i>Il6</i>   | ACACATGTTCTCTGGGAAATCGT       | AAGTGCATCATCGTTGTTTCATACA     |
| <i>Il10</i>  | GCTCTTACTGACTGGCATGAG         | CGCAGCTCTAGGAGCATGTG          |
| <i>Il12a</i> | CTGTGCCTTGGTAGCATCTATG        | GCAGAGTCTCGCCATTATGATTC       |
| <i>Il12b</i> | TGGTTTGCCATCGTTTTGCTG         | ACAGGTGAGGTTCACTGTTTCT        |
| <i>Ccl1</i>  | TGCCGTGTGGATAACAGGATG         | GTTGAGGCCGAGCTTTCTCTA         |
| <i>Ccl2</i>  | CCAGCAAGATGATCCCAATG          | TACGGGTCAACTTCACATTC          |
| <i>Ccl3</i>  | GATTCCACGCCAATTCATCG          | AGGCATTCAGTTCCAGGTCA          |
| <i>Ccl4</i>  | TTTCTTACACCTCCCGGC            | AGCTGCTCAGTTCAACTCCA          |
| <i>Ccl5</i>  | GCTGCTTTGCCTACCTCTCC          | TCGAGTGACAAACACGACTGC         |

363

#### 364 **Cytokine and chemokine assays**

365 The protein levels of murine IL-10, CCL2, CCL3, CCL4, and CCL5 from whole  
366 liver and serum were measured using a cytometric bead assay flex set (BD Pharmingen)  
367 according to the manufacturer's instructions. The levels of mouse IL-6, IL-12p40, and  
368 TNF- $\alpha$  were determined using a cytokine-specific enzyme-linked immunosorbent assay  
369 kit (R&D Systems). Protocols were used according to the manufacturer's instructions.

#### 370 **Analyses of serum ALT and hepatic hydroxyproline**

371 For analysis of serum ALT, blood was sampled and centrifuged for collecting sera.  
372 For analysis of hepatic hydroxyproline, liver tissue was homogenized with an equal  
373 volume of PBS that contained a protease inhibitor cocktail (Sigma-Aldrich, St. Louis,  
374 Mo.) and centrifuged for collecting supernatants. Serum ALT and hepatic  
375 hydroxyproline levels were measured using commercially available kits (Jiancheng,  
376 Nanjing, China).

#### 377 **Liver histology**

378 A portion of the liver tissue was fixed in 4% paraformaldehyde, embedded in

379 paraffin, cut into 5- $\mu$ m sections, and stained with hematoxylin-eosin or picosirius red  
380 using standard protocols.

### 381 **Statistical analysis**

382 All data are expressed as mean  $\pm$  SD and were analyzed using GraphPad Prism  
383 6.01 software. Two-tailed, unpaired Student's t tests were used to compare variables  
384 between two groups.  $P < 0.05$  was considered statistically significant.

### 385 **Acknowledgements**

386 We thank Professor Zhigang Tian for providing the *III0*<sup>-/-</sup> mice.

### 387 **References**

- 388 1. Wilson MS, Mentink-Kane MM, Pesce JT, Ramalingam TR, Thompson R, Wynn  
389 TA. Immunopathology of schistosomiasis. *Immunol Cell Biol.* 2007;85(2):148-  
390 154.
- 391 2. Barron L, Wynn TA. Macrophage activation governs schistosomiasis-induced  
392 inflammation and fibrosis. *Eur J Immunol.* 2011;41(9):2509-2514.
- 393 3. Nascimento M, Huang SC, Smith A, Everts B, Lam W, Bassity E, et al. Ly6Chi  
394 monocyte recruitment is responsible for Th2 associated host-protective  
395 macrophage accumulation in liver inflammation due to schistosomiasis. *PLoS*  
396 *Pathog.* 2014;10(8):e1004282.
- 397 4. Girgis NM, Gundra UM, Ward LN, Cabrera M, Frevert U, Loke P. Ly6C(high)  
398 monocytes become alternatively activated macrophages in schistosome  
399 granulomas with help from CD4+ cells. *PLoS Pathog.* 2014;10(6):e1004080.
- 400 5. Galastri S, Zamara E, Milani S, Novo E, Provenzano A, Delogu W, et al. Lack of

- 401 CC chemokine ligand 2 differentially affects inflammation and fibrosis according  
402 to the genetic background in a murine model of steatohepatitis. *Clin Sci (Lond)*.  
403 2012;123(7):459-471.
- 404 6. Heymann F, Hammerich L, Storch D, Bartneck M, Huss S, Russeler V, et al.  
405 Hepatic macrophage migration and differentiation critical for liver fibrosis is  
406 mediated by the chemokine receptor C-C motif chemokine receptor 8 in mice.  
407 *Hepatology*. 2012;55(3):898-909.
- 408 7. Zimmermann HW, Seidler S, Nattermann J, Gassler N, Hellerbrand C, Zernecke  
409 A, et al. Functional contribution of elevated circulating and hepatic non-classical  
410 CD14CD16 monocytes to inflammation and human liver fibrosis. *PLoS One*.  
411 2010;5(6):e11049.
- 412 8. Ju C, Tacke F. Hepatic macrophages in homeostasis and liver diseases: from  
413 pathogenesis to novel therapeutic strategies. *Cell Mol Immunol*. 2016;13(3):316-  
414 327.
- 415 9. Tacke F. Targeting hepatic macrophages to treat liver diseases. *J Hepatol*.  
416 2017;66(6):1300-1312.
- 417 10. Tacke F, Zimmermann HW. Macrophage heterogeneity in liver injury and fibrosis.  
418 *J Hepatol*. 2014;60(5):1090-1096.
- 419 11. Murray PJ, Allen JE, Biswas SK, Fisher EA, Gilroy DW, Goerdts S, et al.  
420 Macrophage activation and polarization: nomenclature and experimental  
421 guidelines. *Immunity*. 2014;41(1):14-20.
- 422 12. Gause WC, Wynn TA, Allen JE. Type 2 immunity and wound healing:

- 423 evolutionary refinement of adaptive immunity by helminths. *Nat Rev Immunol.*  
424 2013;13(8):607-614.
- 425 13. Borthwick LA, Barron L, Hart KM, Vannella KM, Thompson RW, Oland S, et al.  
426 Macrophages are critical to the maintenance of IL-13-dependent lung inflammation  
427 and fibrosis. *Mucosal Immunol.* 2016;9(1):38-55.
- 428 14. Haeberlein S, Obieglo K, Ozir-Fazalalikhani A, Chaye MAM, Veninga H, van der  
429 Vlugt L, et al. Schistosome egg antigens, including the glycoprotein IPSE/alpha-1,  
430 trigger the development of regulatory B cells. *PLoS Pathog.* 2017;13(7):e1006539.
- 431 15. Mangan NE, Fallon RE, Smith P, van Rooijen N, McKenzie AN, Fallon PG.  
432 Helminth infection protects mice from anaphylaxis via IL-10-producing B cells. *J*  
433 *Immunol.* 2004;173(10):6346-6356.
- 434 16. Fairfax KC, Amiel E, King IL, Freitas TC, Mohrs M, Pearce EJ. IL-10R blockade  
435 during chronic schistosomiasis mansoni results in the loss of B cells from the liver  
436 and the development of severe pulmonary disease. *PLoS Pathog.*  
437 2012;8(1):e1002490.
- 438 17. Jankovic D, Cheever AW, Kullberg MC, Wynn TA, Yap G, Caspar P, et al. CD4+  
439 T cell-mediated granulomatous pathology in schistosomiasis is downregulated by  
440 a B cell-dependent mechanism requiring Fc receptor signaling. *J Exp Med.*  
441 1998;187(4):619-629.
- 442 18. Ferru I, Roye O, Delacre M, Auriault C, Wolowczuk I. Infection of B-cell-deficient  
443 mice by the parasite *Schistosoma mansoni*: demonstration of the participation of B  
444 cells in granuloma modulation. *Scand J Immunol.* 1998;48(3):233-240.

- 445 19. Aziz M, Holodick NE, Rothstein TL, Wang P. The role of B-1 cells in inflammation.  
446 Immunol Res. 2015;63(1-3):153-166.
- 447 20. Herzenberg LA, Tung JW. B cell lineages: documented at last! Nat Immunol.  
448 2006;7(3):225-226.
- 449 21. Maseda D, Candando KM, Smith SH, Kalampokis I, Weaver CT, Plevy SE, et al.  
450 Peritoneal cavity regulatory B cells (B10 cells) modulate IFN-gamma+CD4+ T cell  
451 numbers during colitis development in mice. J Immunol. 2013;191(5):2780-2795.
- 452 22. Baumgarth N, Herman OC, Jager GC, Brown LE, Herzenberg LA, Chen J. B-1 and  
453 B-2 cell-derived immunoglobulin M antibodies are nonredundant components of  
454 the protective response to influenza virus infection. J Exp Med. 2000;192(2):271-  
455 280.
- 456 23. Baumgarth N. The double life of a B-1 cell: self-reactivity selects for protective  
457 effector functions. Nat Rev Immunol. 2011;11(1):34-46.
- 458 24. Ramachandran P, Pellicoro A, Vernon MA, Boulter L, Aucott RL, Ali A, et al.  
459 Differential Ly-6C expression identifies the recruited macrophage phenotype,  
460 which orchestrates the regression of murine liver fibrosis. Proc Natl Acad Sci U S  
461 A. 2012;109(46):E3186-3195.
- 462 25. Brempele KJ, Crispe IN. Infiltrating monocytes in liver injury and repair. Clin  
463 Transl Immunology. 2016;5(11):e113.
- 464 26. Ingersoll MA, Spanbroek R, Lottaz C, Gautier EL, Frankenberger M, Hoffmann R,  
465 et al. Comparison of gene expression profiles between human and mouse monocyte  
466 subsets. Blood. 2010;115(3):e10-19.

- 467 27. Candando KM, Lykken JM, Tedder TF. B10 cell regulation of health and disease.  
468 Immunol Rev. 2014;259(1):259-272.
- 469 28. Yang YQ, Yang W, Yao Y, Ma HD, Wang YH, Li L, et al. Dysregulation of  
470 peritoneal cavity B1a cells and murine primary biliary cholangitis. Oncotarget.  
471 2016;7(19):26992-27006.
- 472 29. O'Garra A, Chang R, Go N, Hastings R, Haughton G, Howard M. Ly-1 B (B-1)  
473 cells are the main source of B cell-derived interleukin 10. Eur J Immunol.  
474 1992;22(3):711-717.
- 475 30. Bouaziz JD, Yanaba K, Tedder TF. Regulatory B cells as inhibitors of immune  
476 responses and inflammation. Immunol Rev. 2008;224:201-214.
- 477 31. Thapa M, Chinnadurai R, Velazquez VM, Tedesco D, Elrod E, Han JH, et al. Liver  
478 fibrosis occurs through dysregulation of MyD88-dependent innate B-cell activity.  
479 Hepatology. 2015;61(6):2067-2079.
- 480 32. Novobrantseva TI, Majeau GR, Amatucci A, Kogan S, Brenner I, Casola S, et al.  
481 Attenuated liver fibrosis in the absence of B cells. J Clin Invest.  
482 2005;115(11):3072-3082.
- 483 33. Baeck C, Wei X, Bartneck M, Fech V, Heymann F, Gassler N, et al.  
484 Pharmacological inhibition of the chemokine C-C motif chemokine ligand 2  
485 (monocyte chemoattractant protein 1) accelerates liver fibrosis regression by  
486 suppressing Ly-6C(+) macrophage infiltration in mice. Hepatology.  
487 2014;59(3):1060-1072.
- 488 34. Baeck C, Wehr A, Karlmark KR, Heymann F, Vucur M, Gassler N, et al.

- 489 Pharmacological inhibition of the chemokine CCL2 (MCP-1) diminishes liver  
490 macrophage infiltration and steatohepatitis in chronic hepatic injury. *Gut*.  
491 2012;61(3):416-426.
- 492 35. Pesce JT, Ramalingam TR, Mentink-Kane MM, Wilson MS, El Kasmi KC, Smith  
493 AM, et al. Arginase-1-expressing macrophages suppress Th2 cytokine-driven  
494 inflammation and fibrosis. *PLoS Pathog*. 2009;5(4):e1000371.
- 495 36. Vannella KM, Barron L, Borthwick LA, Kindrachuk KN, Narasimhan PB, Hart  
496 KM, et al. Incomplete deletion of IL-4Ralpha by LysM(Cre) reveals distinct  
497 subsets of M2 macrophages controlling inflammation and fibrosis in chronic  
498 schistosomiasis. *PLoS Pathog*. 2014;10(9):e1004372.
- 499 37. Mauri C, Bosma A. Immune regulatory function of B cells. *Annu Rev Immunol*.  
500 2012;30:221-241.
- 501 38. Murai M, Turovskaya O, Kim G, Madan R, Karp CL, Cheroutre H, et al. Interleukin  
502 10 acts on regulatory T cells to maintain expression of the transcription factor  
503 Foxp3 and suppressive function in mice with colitis. *Nat Immunol*.  
504 2009;10(11):1178-1184.
- 505 39. Weber GF, Chousterman BG, Hilgendorf I, Robbins CS, Theurl I, Gerhardt LM, et  
506 al. Pleural innate response activator B cells protect against pneumonia via a GM-  
507 CSF-IgM axis. *J Exp Med*. 2014;211(6):1243-1256.
- 508 40. Sziksz E, Pap D, Lippai R, Beres NJ, Fekete A, Szabo AJ, et al. Fibrosis Related  
509 Inflammatory Mediators: Role of the IL-10 Cytokine Family. *Mediators Inflamm*.  
510 2015;2015:764641.



- 511 41. Jin Y, Liu R, Xie J, Xiong H, He JC, Chen N. Interleukin-10 deficiency aggravates  
512 kidney inflammation and fibrosis in the unilateral ureteral obstruction mouse model.  
513 Lab Invest. 2013;93(7):801-811.
- 514 42. Siqueira Mietto B, Kroner A, Girolami EI, Santos-Nogueira E, Zhang J, David S.  
515 Role of IL-10 in Resolution of Inflammation and Functional Recovery after  
516 Peripheral Nerve Injury. J Neurosci. 2015;35(50):16431-16442.

## 517 **Figure Legends**

518 **Fig 1. Mice lacking B cells exhibit more severe liver pathology than wild-type mice**  
519 **after *S. japonicum* infection.** (A) Schematic representation of the model of *S.*  
520 *japonicum* infection. WT mice and  $\mu$ MT mice were infected with 18–20 cercariae of *S.*  
521 *japonicum*, and liver samples from these mice were harvested at the times indicated  
522 after infection. Comparisons were made with uninfected control mice. (B, C)  
523 Representative graphs of hematoxylin-eosin staining (B) and picrosirius red staining (C)  
524 of liver specimens. (B) All images were taken at 200  $\times$  magnification. The red outlined  
525 areas indicate granulomas. (C) All images were taken at 40  $\times$  magnification. (D-G)  
526 Statistical analysis of granuloma sizes (D), proportion of collagen areas (E), amount of  
527 hepatic hydroxyproline (F) and levels of serum alanine transaminase (ALT) (G). Data  
528 represent mean  $\pm$  SD; n = 5–7 per time point from two independent experiments. \* $p$  <  
529 0.05, versus WT mice, two-tailed, unpaired Student's *t* test.

530 **Fig 2. B cell deficiency results in increased number of macrophages.** The infiltration  
531 of hepatic leukocytes (CD45<sup>+</sup>), macrophages (CD11b<sup>+</sup>F4/80<sup>+</sup>), neutrophils  
532 (CD11b<sup>+</sup>Ly6G<sup>+</sup>), T cells (CD3<sup>+</sup>NK1.1<sup>-</sup>), NK cells (CD3<sup>-</sup>NK1.1<sup>+</sup>), and NKT cells

533 (CD3<sup>+</sup>NK1.1<sup>+</sup>) after infection were quantified by flow cytometric analysis. Controls  
534 (Ctrl) were uninfected mice. Data represent mean  $\pm$  SD; n = 3–5 per time point from  
535 three independent experiment. \* $p$  < 0.05, versus WT mice, two-tailed, unpaired  
536 Student's  $t$  test.

537 **Fig 3. Ly6C<sup>hi</sup> MoMFs are significantly increased in  $\mu$ MT mice.** Flow cytometric  
538 analysis of macrophage subsets in WT mice and  $\mu$ MT mice after *S. japonicum* infection.  
539 (A) Representative fluorescence-activated cell sorting plots are shown for the indicated  
540 times after *S. japonicum* infection. Upper panels are pre-gated on CD45<sup>+</sup> and live cells.  
541 Bottom panels are pre-gated on CD45<sup>+</sup>CD11b<sup>hi</sup>F4/80<sup>lo</sup> cells. (B) Graphical summary  
542 showing percentage of Kupffer cell (KCs) (CD11b<sup>lo</sup>F4/80<sup>hi</sup>), Ly6C<sup>hi</sup> MoMF  
543 (CD11b<sup>hi</sup>F4/80<sup>lo</sup>Ly6C<sup>hi</sup>), and Ly6C<sup>lo</sup> MoMF (CD11b<sup>hi</sup>F4/80<sup>lo</sup>Ly6C<sup>lo</sup>) subsets out of total  
544 hepatic macrophags. (C) Absolute numbers of KCs, Ly6C<sup>hi</sup> MoMFs, and Ly6C<sup>lo</sup>  
545 MoMFs in WT mice and  $\mu$ MT mice. Data represent mean  $\pm$  SD; n = 8–10 per time  
546 point from three independent experiments. \* $p$  < 0.05, \*\* $p$  < 0.01, versus WT mice, two-  
547 tailed, unpaired Student's  $t$  test.

548 **Fig 4. Inflammatory cytokines and chemokines are increased in the liver of  $\mu$ MT**  
549 **mice after *S. japonicum* infection.** (A) Relative gene expression of chemokines (*Ccl1*,  
550 *Ccl2*, *Ccl3*, *Ccl4*, and *Ccl5*) and inflammatory cytokines (*Tnfa*, *Il1b*, *Il6*, *Il10*, *Il12a* and  
551 *Il12b*) in the livers of WT mice and  $\mu$ MT mice 6 weeks after infection. Data are from  
552 three independent experiments. (B) Protein levels of CCL2, CCL3, CCL4, CCL5, TNF-  
553  $\alpha$ , IL-6, and IL-12p40 in liver 6 weeks after the infection (n = 5–7 per group from two  
554 independent experiments). Data represent mean  $\pm$  SD. \* $p$  < 0.05, \*\* $p$  < 0.01, two-tailed,

555 unpaired Student's *t* test.

556 **Fig 5. Hepatic B1a cells increase whereas peritoneal cavity (PC) B1a cells decrease**  
557 **after *S. japonicum* infection.** (A) Number of B cells after infection in WT mice. (B)  
558 Representative flow cytometry plots of hepatic B1a, B1b, and B2 cells in WT mice 6  
559 weeks after infection. (C) Graphical summary showing the percentage of B1a, B1b, and  
560 B2 cells out of total B cells (top panel) and the number of indicated subsets (bottom  
561 panel) in the livers of WT mice without infection (Ctrl) and 6 weeks after infection. (D)  
562 Representative flow cytometry plots of PC B1a, B1b, and B2 cells in WT mice without  
563 infection and 6 weeks after infection. (E) The percentage of B1a, B1b, and B2 cells out  
564 of total B cells (left panel) and number of indicated subsets (right panel) in the PC of  
565 WT mice without infection and 6 weeks after infection. Data represent mean  $\pm$  SD; n =  
566 5–7 per group from two independent experiments. \**p* < 0.05, \*\**p* < 0.01, two-tailed,  
567 unpaired Student's *t* test.

568 **Fig 6. Transferred peritoneal cavity (PC) B1a cells preferentially accumulate in**  
569 **the livers of receiving  $\mu$ MT mice.** (A) Schematic representation of the PC B cell  
570 transfer. (B) Purity of PC B cells from WT mice after sorting. (C, D) Flow cytometric  
571 analysis of PC (C) and liver (D) B cell subsets after transfer in  $\mu$ MT mice. (E, F) The  
572 frequencies of B1a, B1b, and B2 cells in PC (E) and liver (F) of donor WT mice and  
573 recipient  $\mu$ MT mice. Data represent mean  $\pm$  SD; n = 5–7 per group from two  
574 independent experiments. \**p* < 0.05, \*\**p* < 0.01, two-tailed, unpaired Student's *t*-test.

575 **Fig 7. IL-10 expression is increased in the liver and in B cells after *S. japonicum***  
576 **infection.** (A) Relative *Il10* gene expression in the livers of WT mice and  $\mu$ MT mice 6

577 weeks after infection; data are from three independent experiments. (B) IL-10 protein  
578 levels in the livers of WT mice and  $\mu$ MT mice 6 weeks after infection. (C) Quantitative  
579 PCR analysis of *Il10* in sorted hepatic B cells; data are from three independent  
580 experiments. (D) The frequency of IL-10–positive cells out of total B cells in the livers  
581 of WT mice was examined by flow cytometry. (E) Graphical summary showing  
582 percentage of IL-10–positive cells out of indicated cell subsets in WT mice 6 weeks  
583 after infection. Data represent mean  $\pm$  SD; n = 5–7 per group from two independent  
584 experiments. \* $p$  < 0.05, \*\* $p$  < 0.01, two-tailed, unpaired Student's *t* test.

585 **Fig 8. Adoptive transfer of WT PC B cells, but not IL10<sup>-/-</sup> PC B cells, attenuates *S.***  
586 ***japonicum*–induced liver pathology in  $\mu$ MT mice.** The  $\mu$ MT mice were infected with  
587 18–20 cercariae of *S. japonicum*. The adoptive transfer of B cells ( $1 \times 10^6$  cells) purified  
588 from the PC of WT or IL-10<sup>-/-</sup> mice into  $\mu$ MT mice was performed 4 weeks after  
589 infection. Mice were sacrificed 6 weeks after infection. (A) Representative images of  
590 hematoxylin-eosin stained liver tissues. (B) Statistical analysis of hepatic granuloma  
591 sizes and (C) serum ALT levels. (D) Representative flow cytometry plots of hepatic  
592 macrophage subsets after cell transfer. (E) Left panel: graphical summary showing  
593 percentage of indicated cell subsets out of total hepatic macrophages in infected  $\mu$ MT  
594 mice after cell transfer. Right panel: number of indicated cell subsets in the liver of  
595 infected  $\mu$ MT mice after cell transfer. (F) Quantitative PCR analysis of chemokine and  
596 inflammatory cytokine gene expression levels in the liver; data are from three  
597 independent experiments. (G) Hepatic chemokine and inflammatory cytokine protein  
598 expression levels were examined by cytometric bead assay and enzyme-linked

599 immunosorbent assay. Data represent mean  $\pm$  SD; n = 5–7 per group from two  
 600 independent experiments. \* $p$  < 0.05, \*\* $p$  < 0.01, two-tailed, unpaired Student's  $t$  test.

601 **Fig 9. Model describing B1a cell suppression of *S. japonicum*–induced liver**  
 602 **pathology.** After *S. japonicum* infection, peritoneal cavity (PC) B1a cells infiltrate the  
 603 liver. These increased numbers of hepatic B1a cells secrete IL-10, which downregulates  
 604 the expression of hepatic CCL2 and CCL3 to inhibit excessive hepatic infiltration of  
 605 Ly6C<sup>hi</sup> monocytes. Thus, B1a cells alleviate liver early inflammation and late fibrosis.  
 606 LSEC, liver sinusoidal endothelial cells.

607 **Table 1. Sequences of primers**

| Gene         | Forward primer (5'–3')  | Reverse primer (5'–3')    |
|--------------|-------------------------|---------------------------|
| <i>Actb</i>  | AGAGGGAAATCGTGCGTGAC    | CAATAGTGATGACCTGGCCGT     |
| <i>Tnfa</i>  | ACTGGCAGAAGAGGCACTC     | CTGGCACCCTAGTTGGTTG       |
| <i>Il1b</i>  | CTGAACTCAACTGTGAAATGC   | TGATGTGCTGCTGCGAGA        |
| <i>Il6</i>   | ACACATGTTCTCTGGGAAATCGT | AAGTGCATCATCGTTGTTTCATACA |
| <i>Il10</i>  | GCTCTTACTGACTGGCATGAG   | CGCAGCTCTAGGAGCATGTG      |
| <i>Il12a</i> | CTGTGCCTTGGTAGCATCTATG  | GCAGAGTCTCGCCATTATGATTC   |
| <i>Il12b</i> | TGGTTTGCCATCGTTTTGCTG   | ACAGGTGAGGTTCACTGTTTCT    |
| <i>Ccl1</i>  | TGCCGTGTGGATACAGGATG    | GTTGAGGCGCAGCTTTCTCTA     |
| <i>Ccl2</i>  | CCAGCAAGATGATCCCAATG    | TACGGGTCAACTTCACATTC      |
| <i>Ccl3</i>  | GATCCACGCCAATTCATCG     | AGGCATTCAGTTCAGGTCA       |
| <i>Ccl4</i>  | TTTCTCTTACACCTCCCGGC    | AGCTGCTCAGTTCAACTCCA      |
| <i>Ccl5</i>  | GCTGCTTTGCCTACCTCTCC    | TCGAGTGACAAACACGACTGC     |

608 **Supporting information**

609 **S1 Fig Quantitation of hepatic egg deposition in *Schistosoma japonicum*–infected**  
 610 **WT mice and  $\mu$ MT mice.** Data represent mean  $\pm$  SD; n = 5–7 samples per time point  
 611 from two independent experiments. Two-tailed, unpaired Student's  $t$  test.

612 **S2 Figure. There is no difference in the numbers of circulating Ly6C<sup>hi</sup> monocytes**  
 613 **in peripheral blood of WT mice and  $\mu$ MT mice.** (A) Gating strategy for detection of  
 614 peripheral Ly6C<sup>hi</sup> monocytes. (B) Representative flow cytometry plots of Ly6C<sup>hi</sup>

615 monocytes in peripheral blood of WT mice and  $\mu$ MT mice. (C) graphical summary  
616 showing percentage of peripheral Ly6C<sup>hi</sup> monocytes out of total monocytes (left panel)  
617 and number of peripheral Ly6C<sup>hi</sup> monocytes (right panel) in WT mice and  $\mu$ MT mice  
618 without infection (Ctrl) and 6 weeks after *Schistosoma japonicum* infection. Data  
619 represent mean  $\pm$  SD; n = 3–5 per group from one experiment. \**p* < 0.05, two-tailed,  
620 unpaired Student's *t* test.

621 **S3 Fig. Serum chemokine levels in  $\mu$ MT mice are lower than those in MT mice.**

622 Serum protein levels of CCL2, CCL3, CCL4 and CCL5 in WT mice and  $\mu$ MT mice  
623 were examined 6 weeks after *Schistosoma japonicum* infection. Data represent mean  $\pm$   
624 SD; n = 5–7 per group from two independent experiments. \**p* < 0.05, two-tailed,  
625 unpaired Student's *t* test.

626 **S4 Fig. Gating strategies for liver and PC B cell subsets. (A)** Representative flow

627 cytometry plots show the gating strategy to identify hepatic B1a cells  
628 (CD3<sup>-</sup>CD19<sup>+</sup>CD5<sup>+</sup>CD23<sup>-</sup>IgM<sup>hi</sup>IgD<sup>lo</sup>), B1b cells (CD3<sup>-</sup>CD19<sup>+</sup>CD5<sup>-</sup>CD23<sup>-</sup>IgM<sup>hi</sup>IgD<sup>lo</sup>),  
629 and B2 cells (CD3<sup>-</sup>CD19<sup>+</sup>CD5<sup>-</sup>CD23<sup>+</sup>IgM<sup>lo</sup>IgD<sup>hi</sup>). (B) PC B1a cells were identified as  
630 CD3<sup>-</sup>CD19<sup>+</sup>CD5<sup>+</sup>CD11b<sup>+</sup>. PC B1b cells were identified as CD3<sup>-</sup>CD19<sup>+</sup>CD5<sup>-</sup>CD11b<sup>+</sup>.  
631 PC B2 cells were identified as CD3<sup>-</sup>CD19<sup>+</sup>CD5<sup>-</sup>CD11b<sup>-</sup>.

632 **S5 Fig The purity of hepatic B cells after sorting.** Representative flow cytometry plots

633 showing the purity of sorted hepatic B cells derived from WT mice.



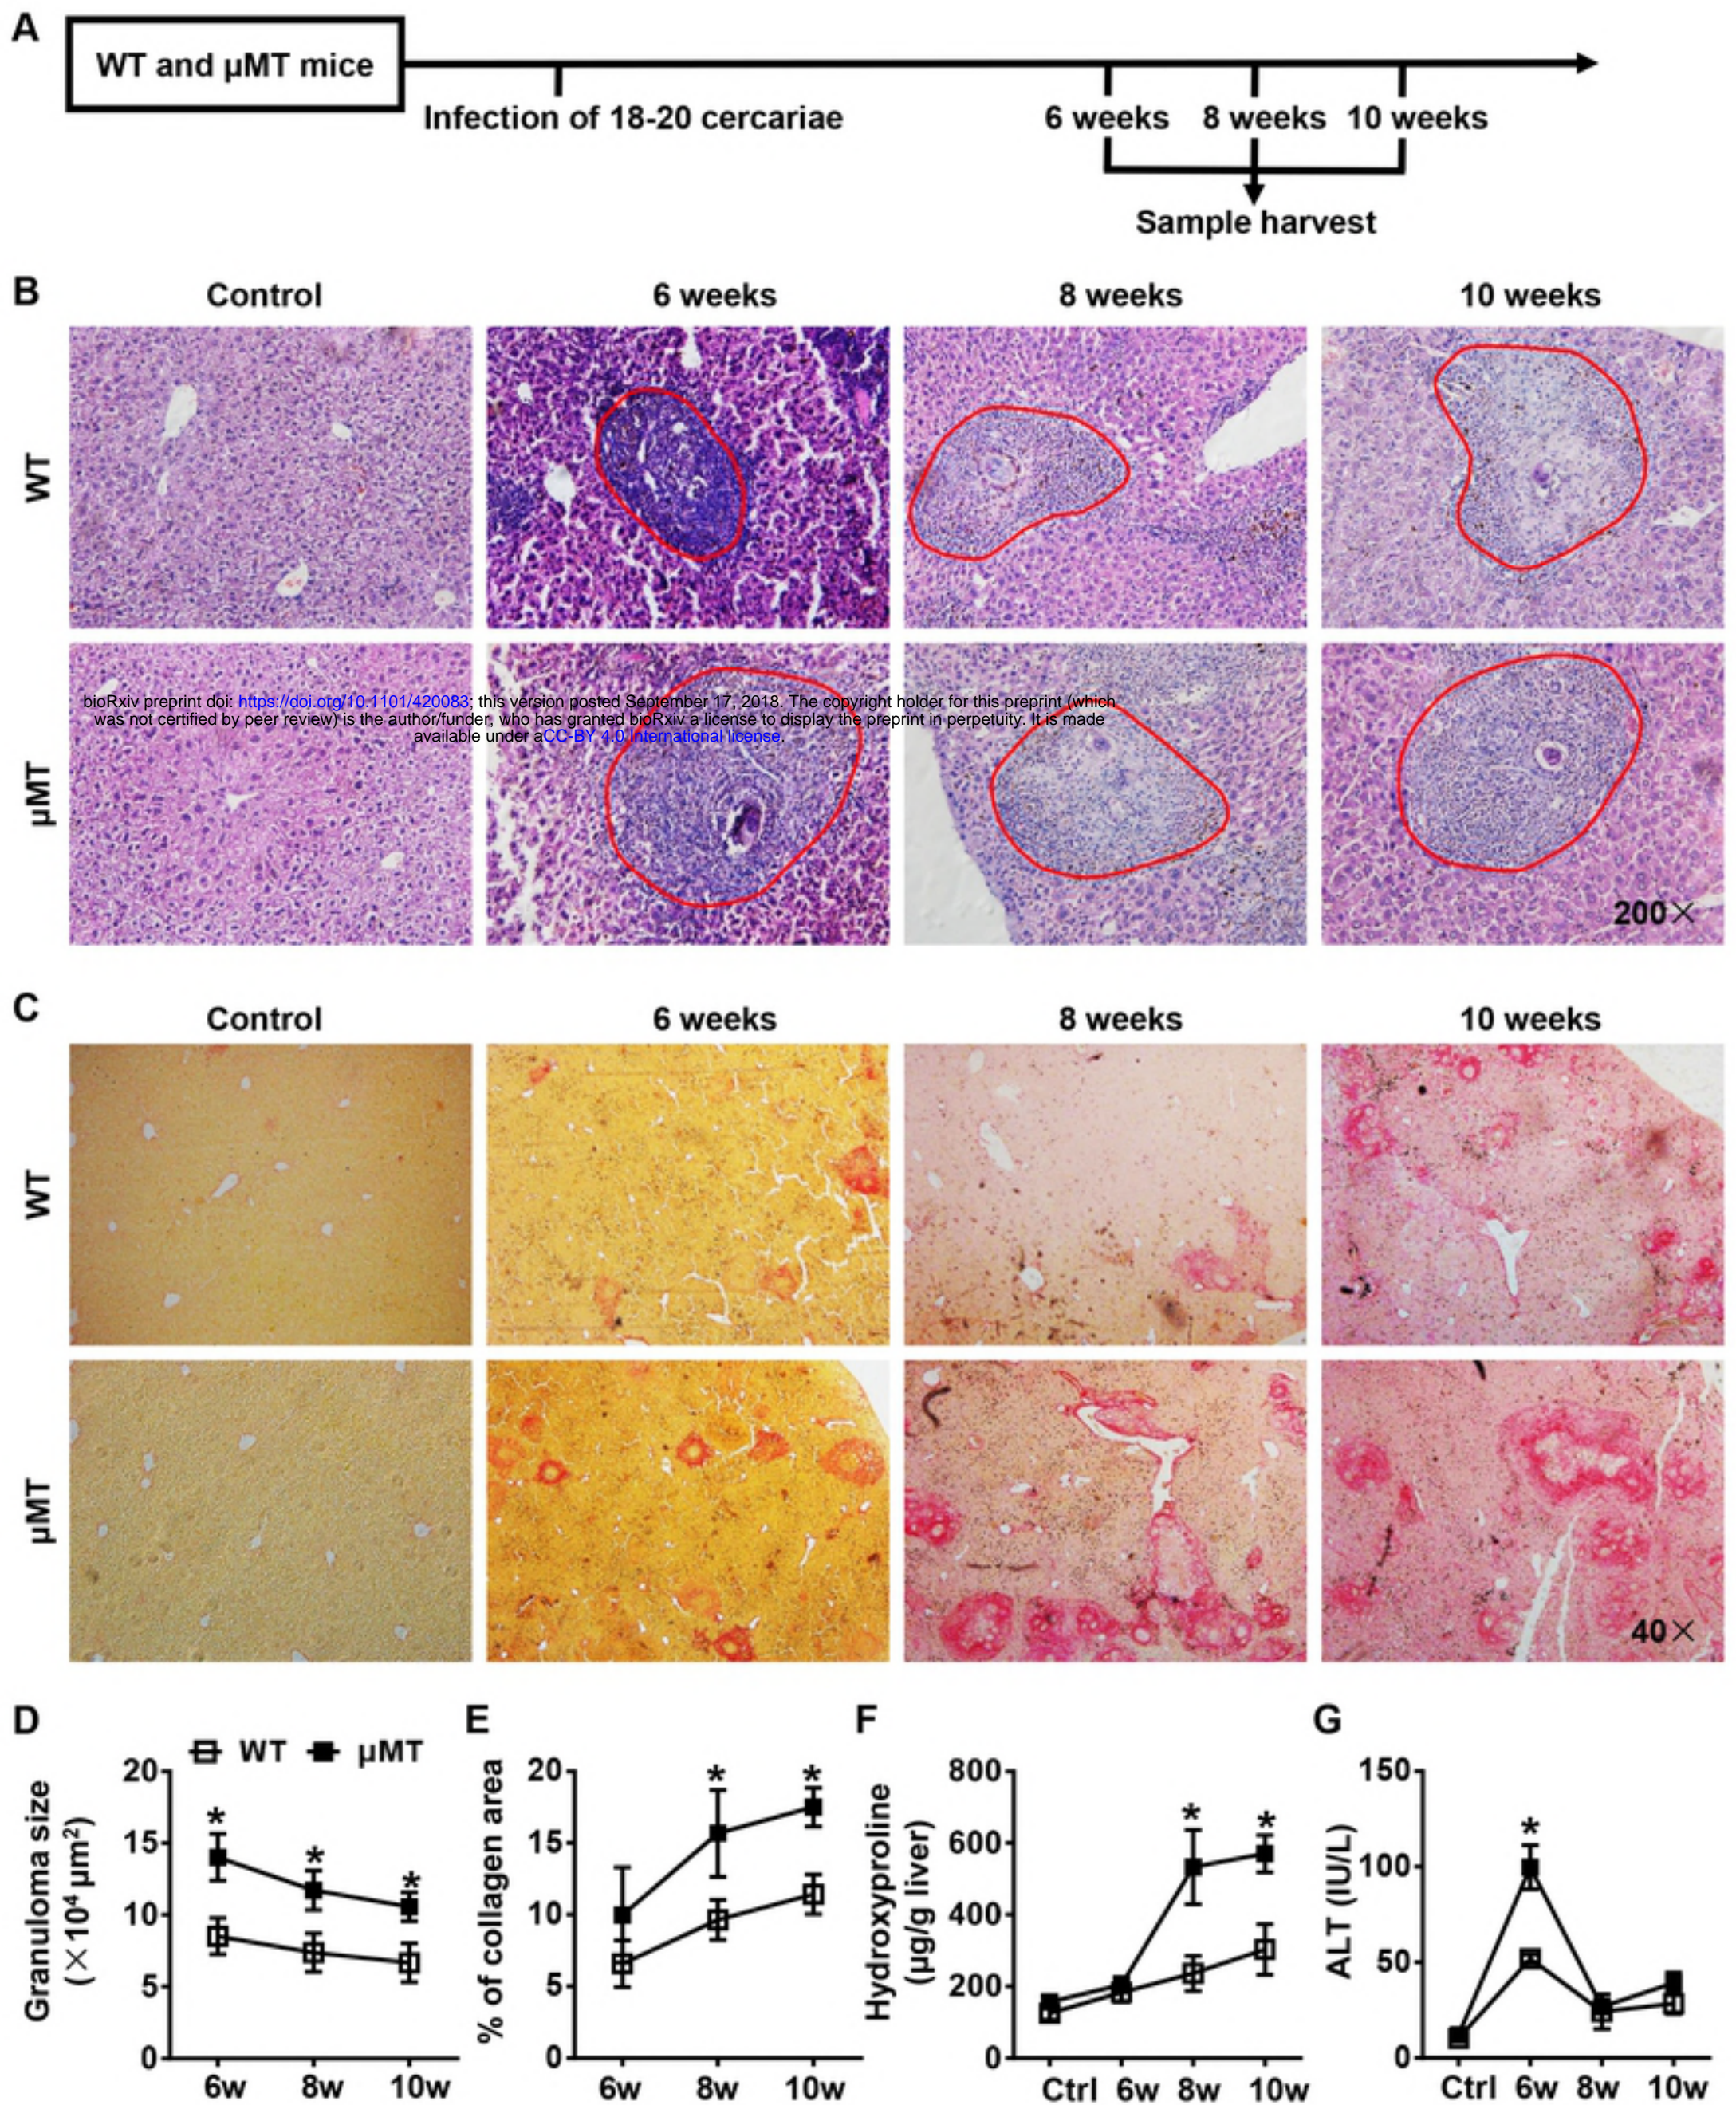

**Fig 1**



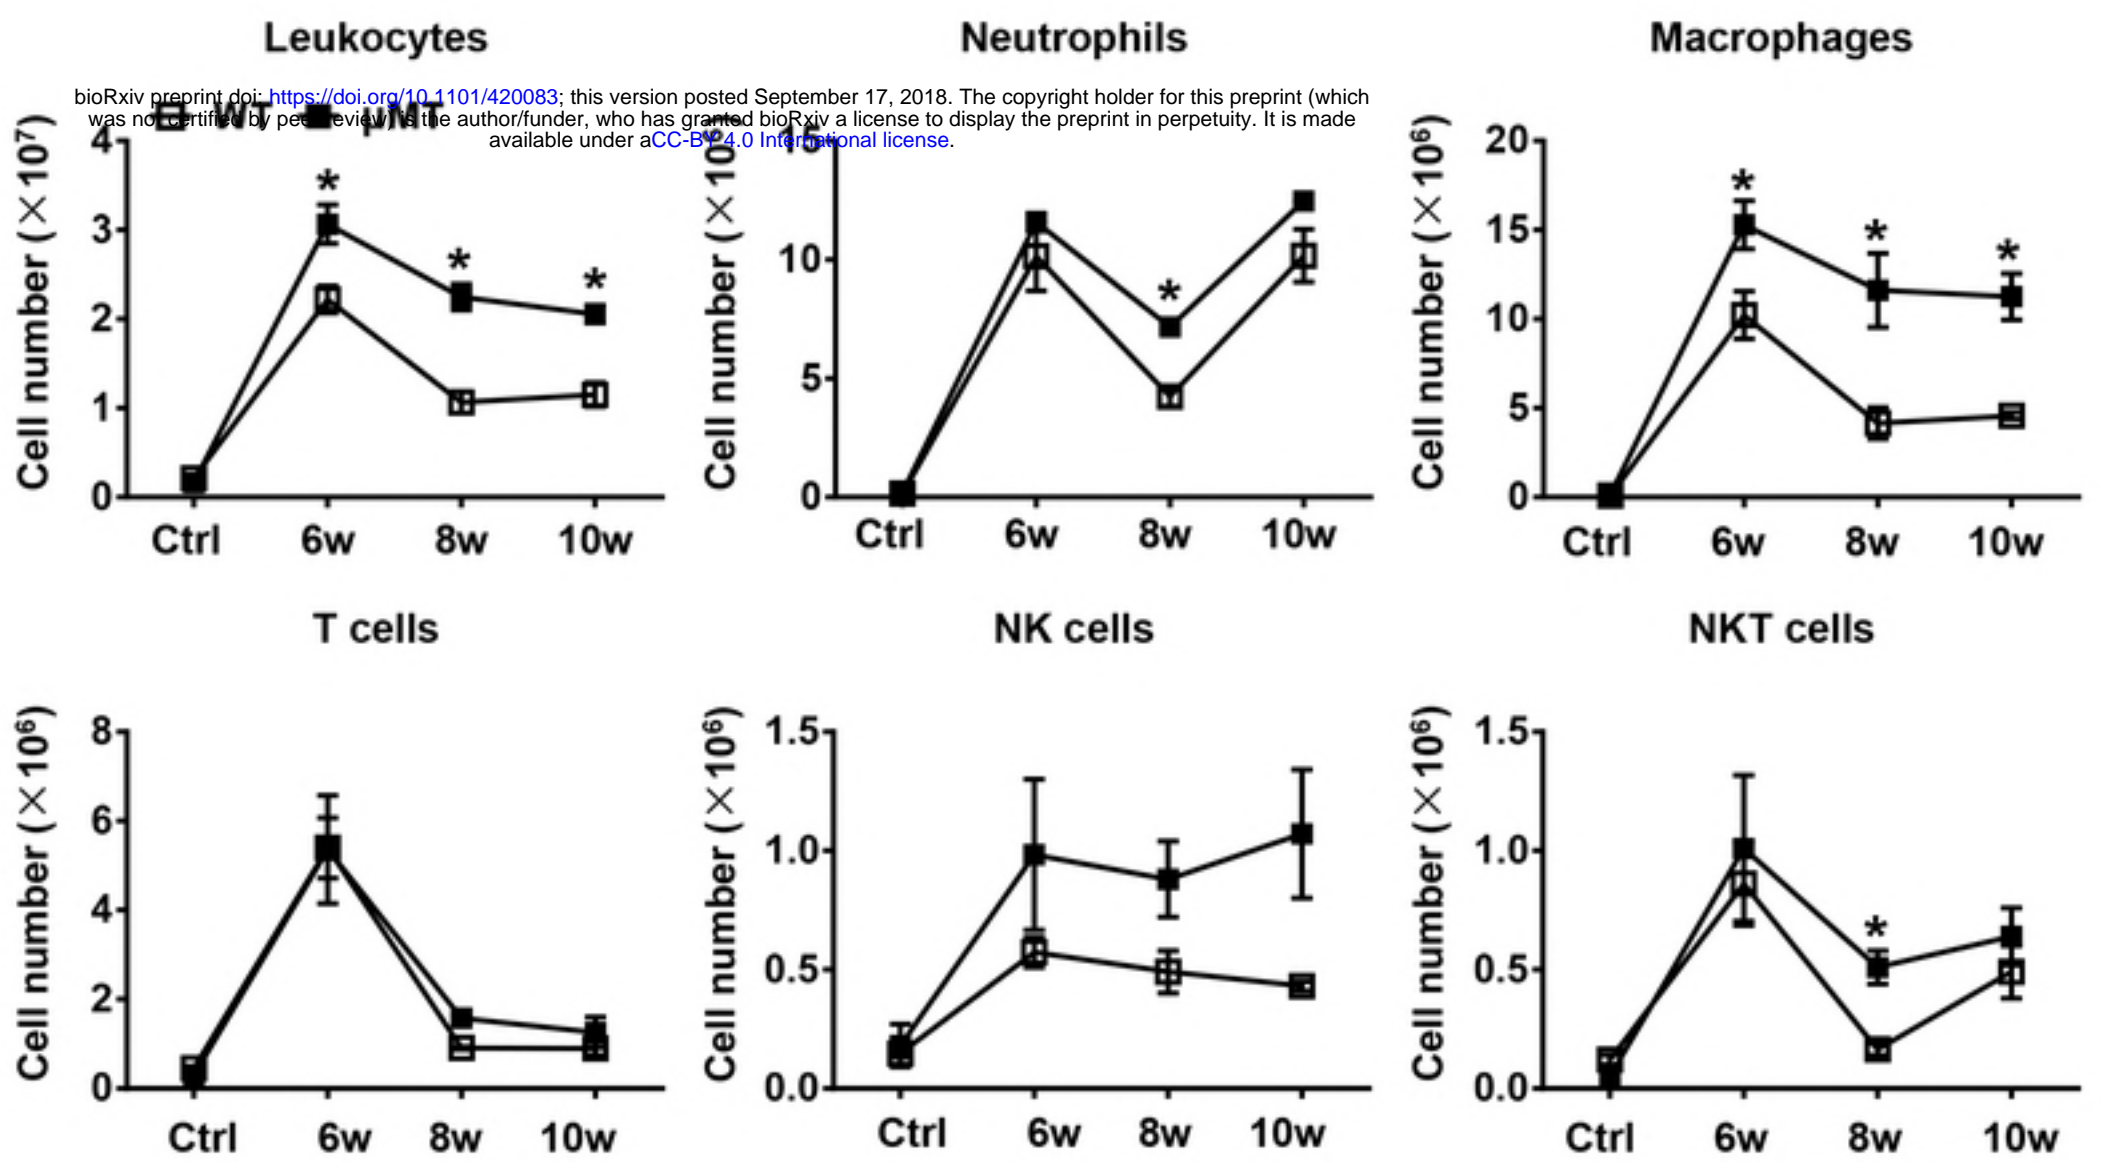

**Fig 2**



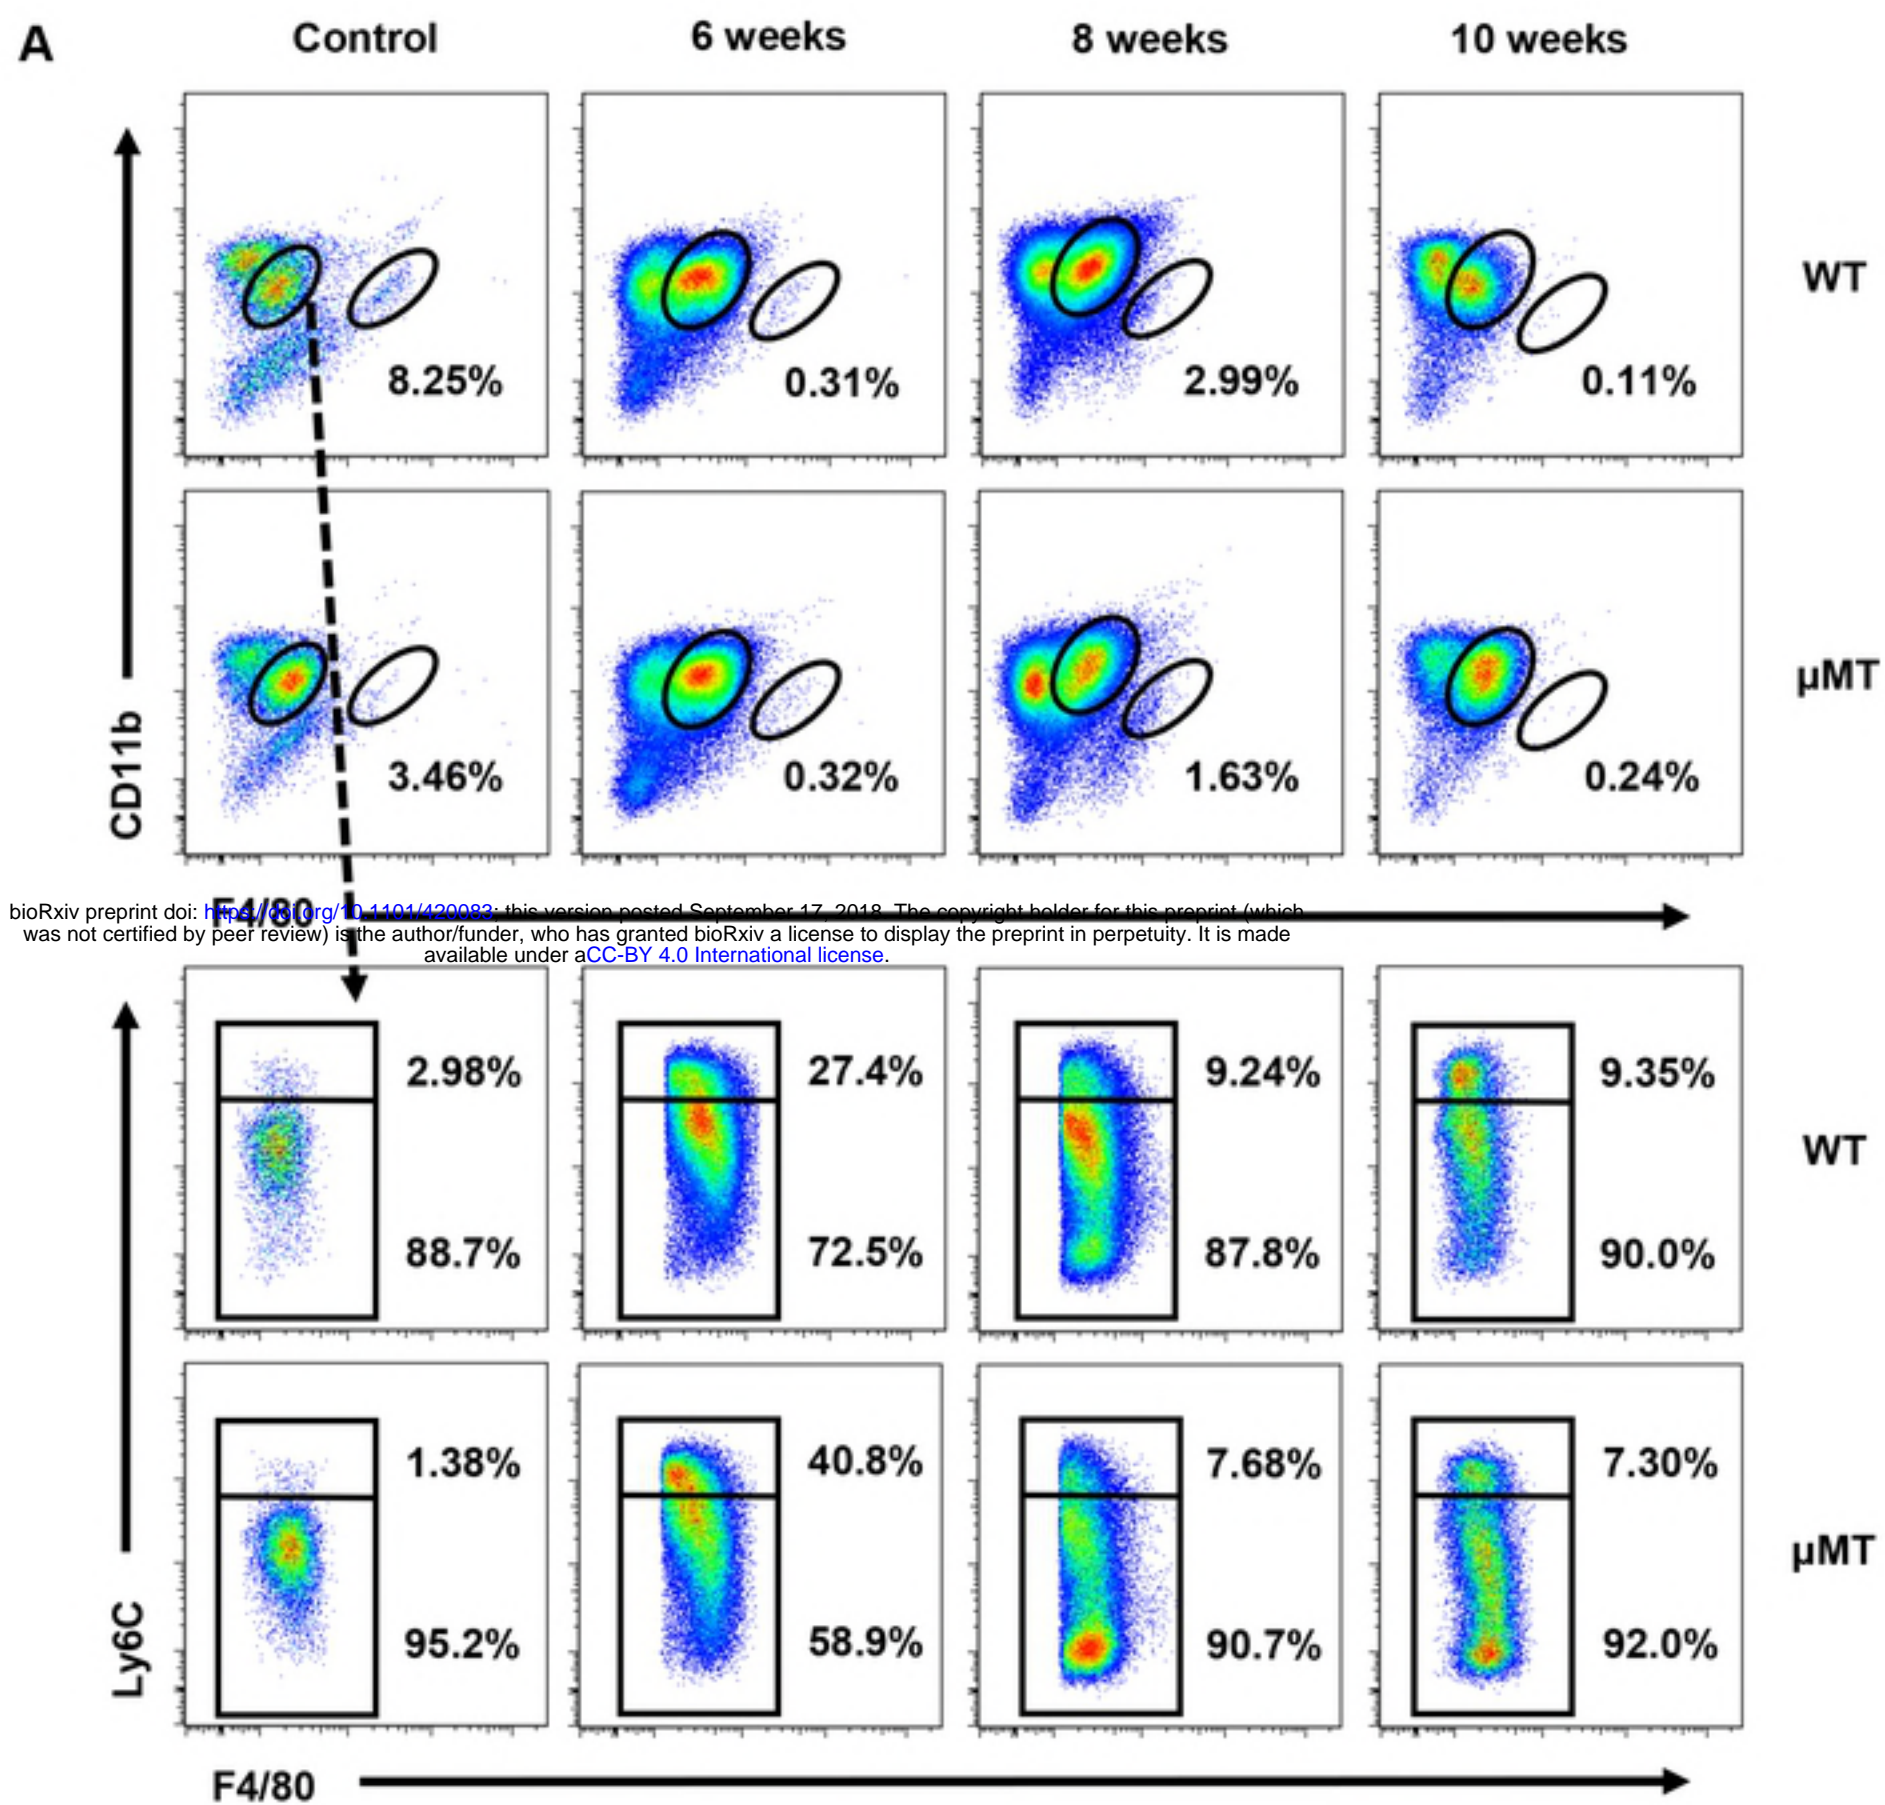

bioRxiv preprint doi: <https://doi.org/10.1101/420083>; this version posted September 17, 2018. The copyright holder for this preprint (which was not certified by peer review) is the author/funder, who has granted bioRxiv a license to display the preprint in perpetuity. It is made available under aCC-BY 4.0 International license.

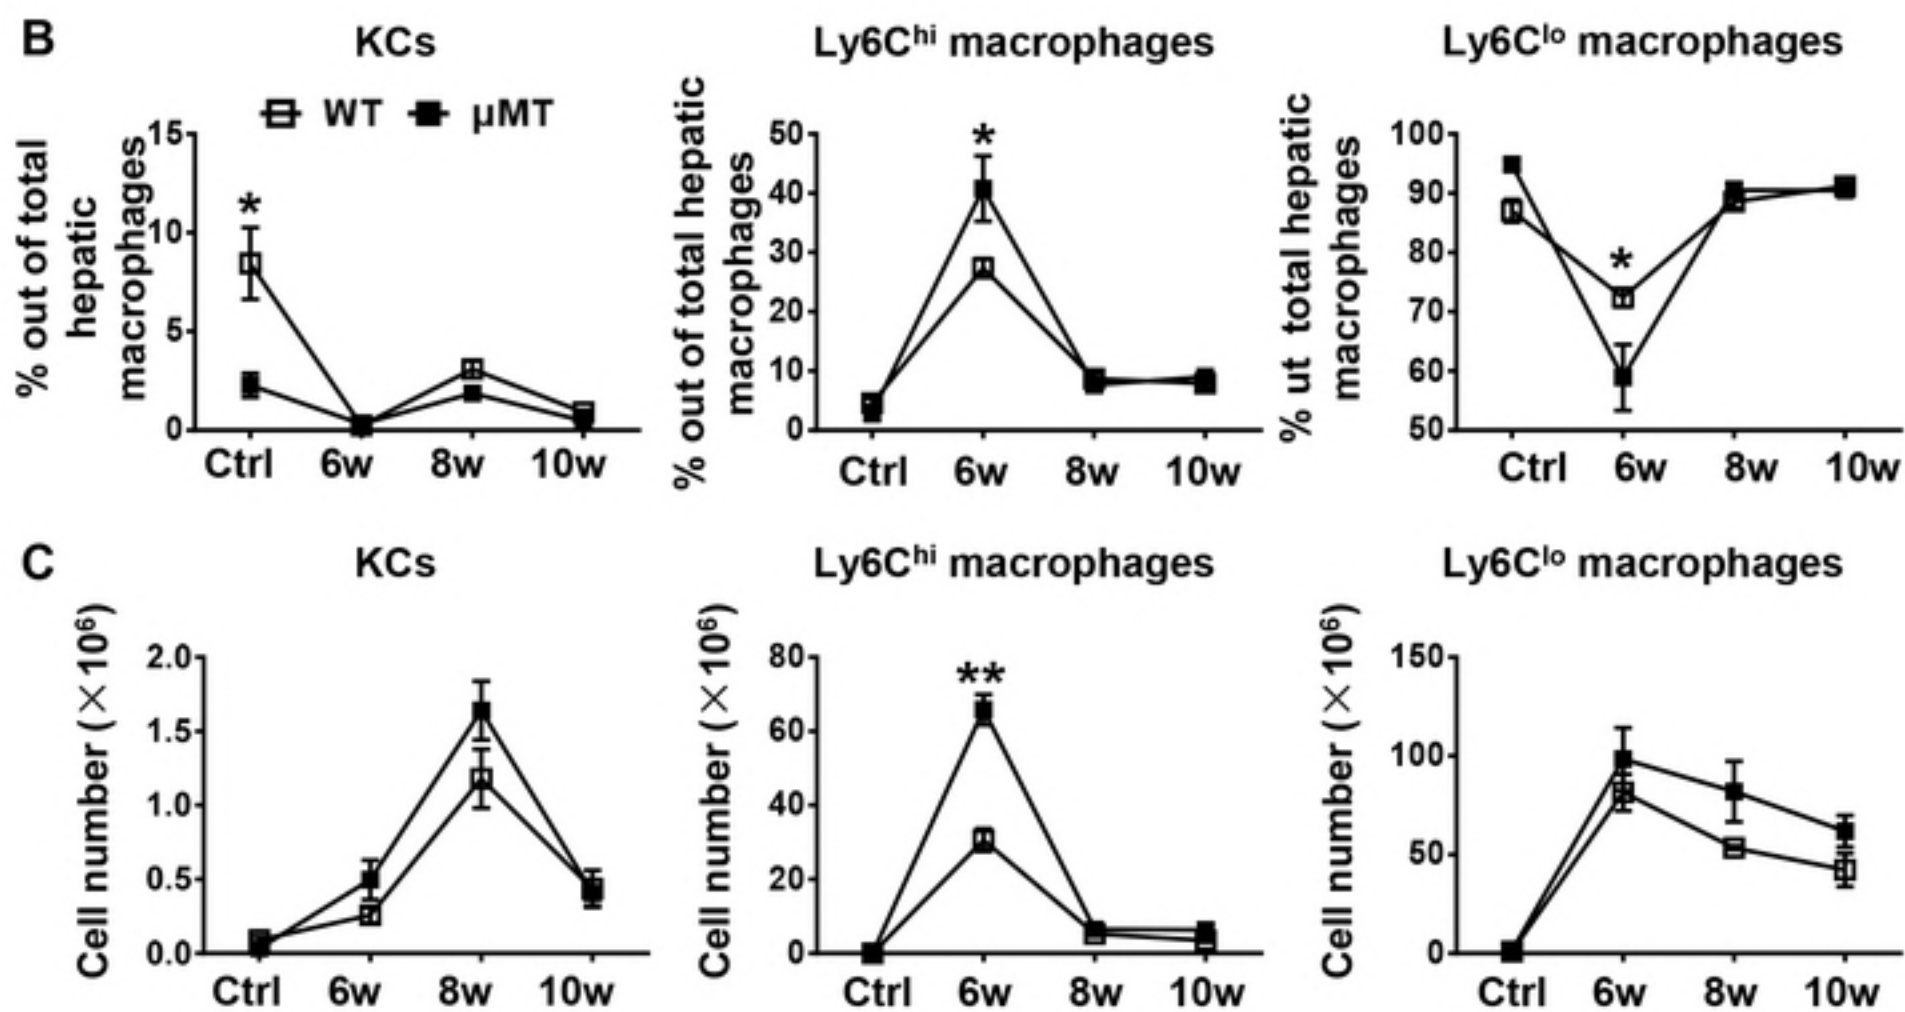

**Fig 3**

bioRxiv preprint doi: <https://doi.org/10.1101/420083>; this version posted September 17, 2018. The copyright holder for this preprint (which was not certified by peer review) is the author/funder, who has granted bioRxiv a license to display the preprint in perpetuity. It is made available under aCC-BY 4.0 International license.

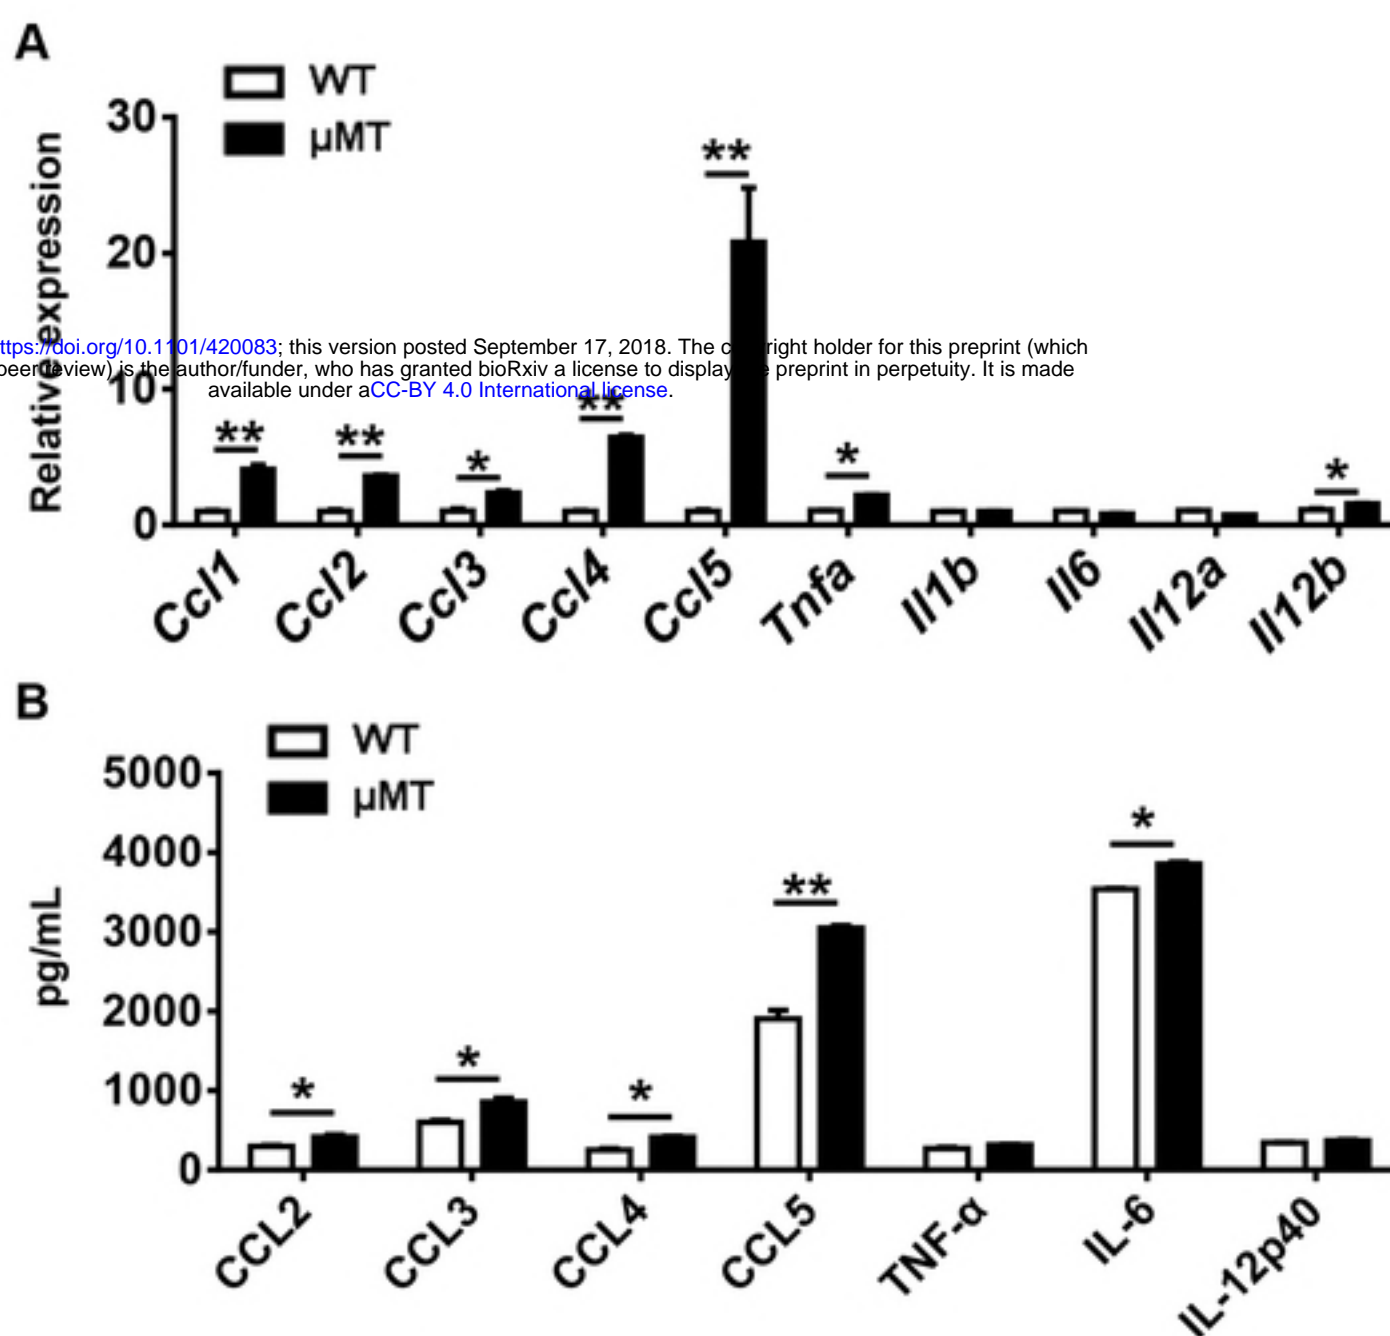

Fig 4

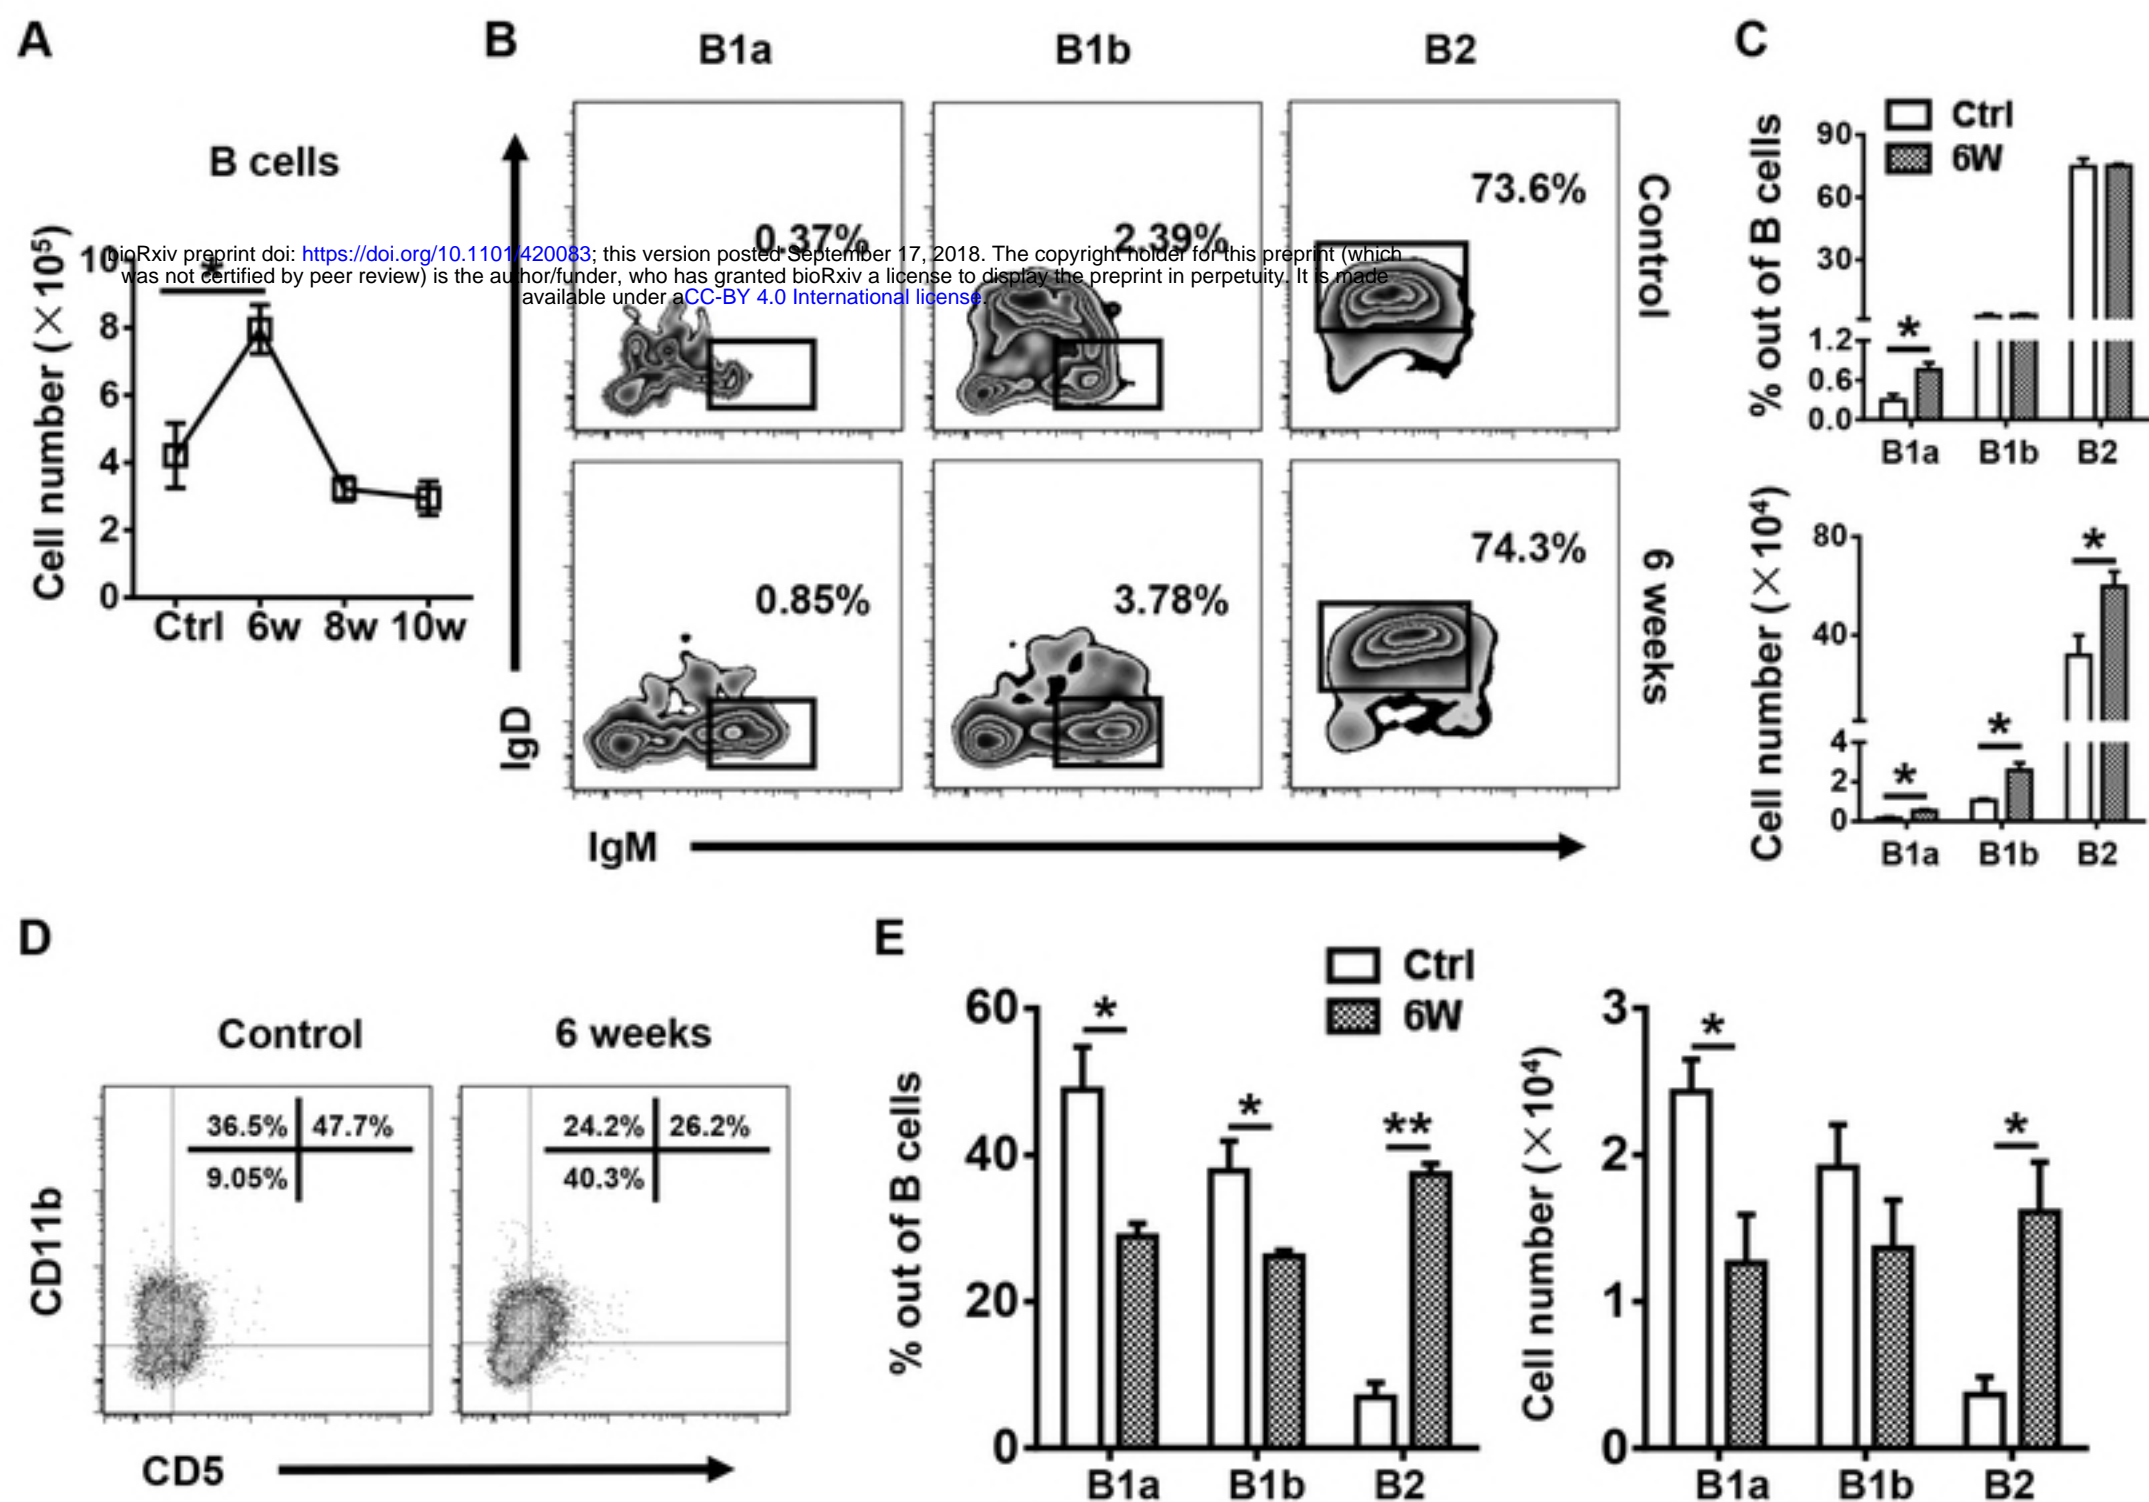

**Fig 5**



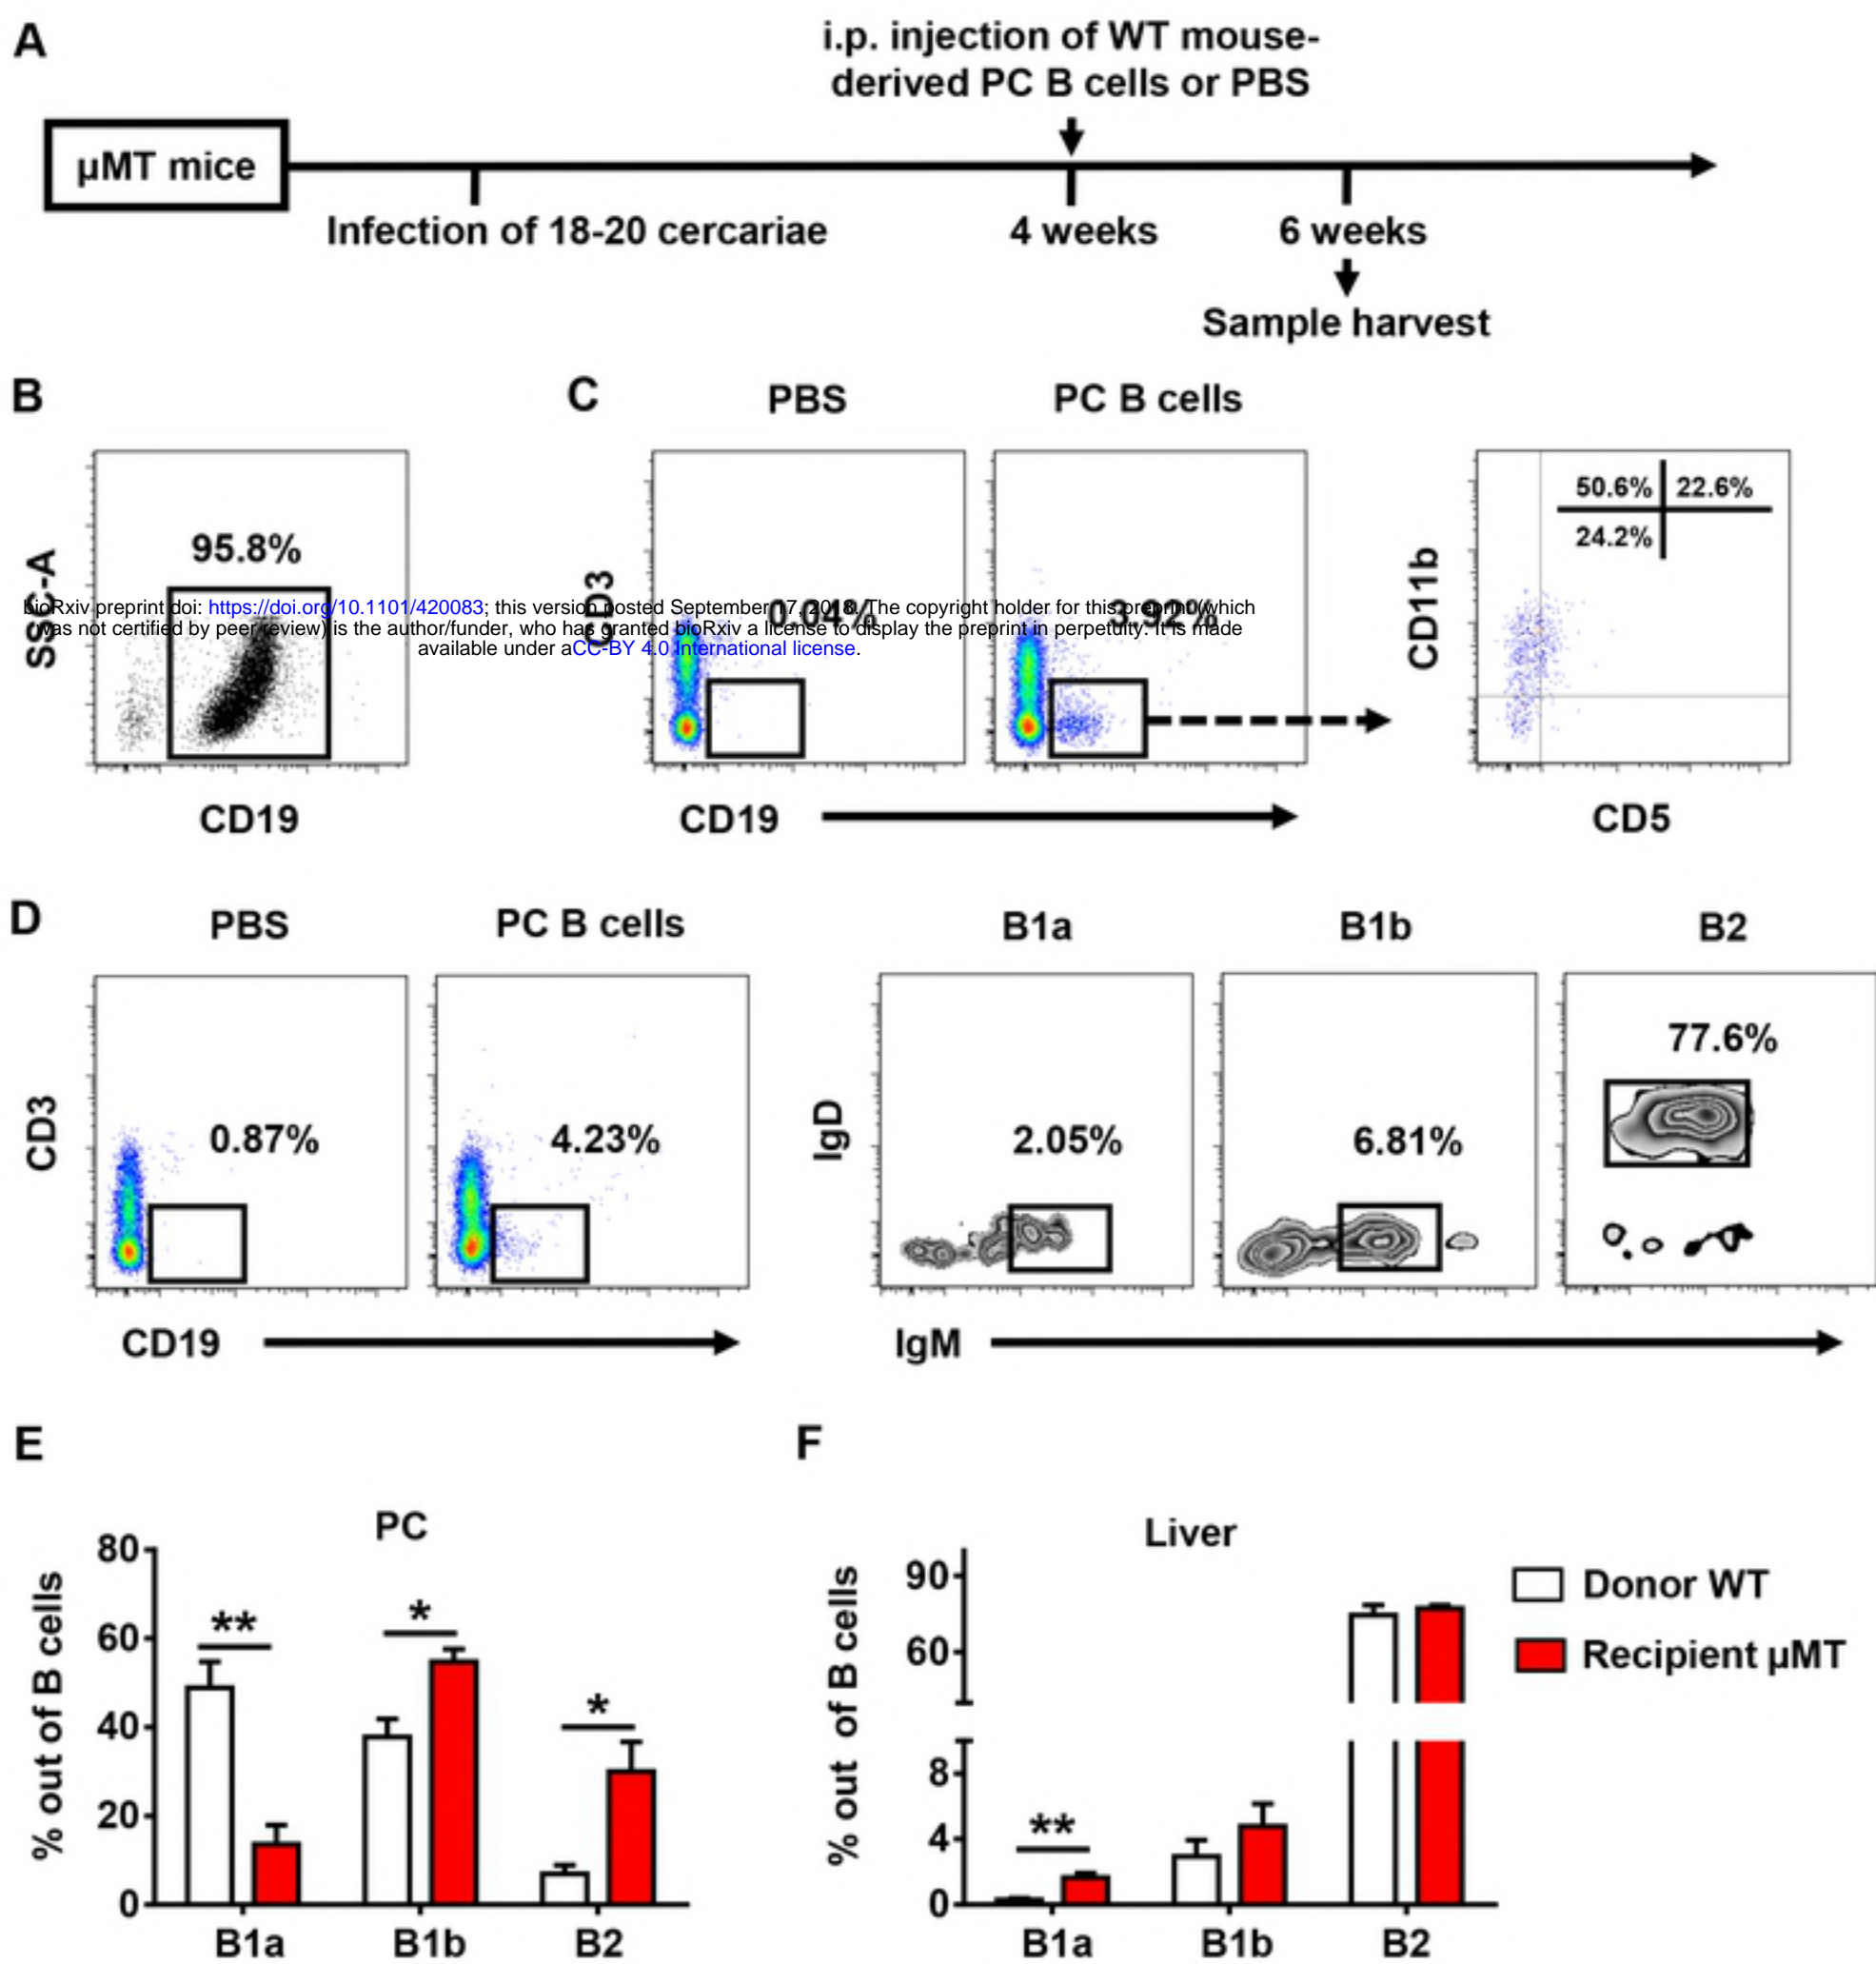

**Fig 6**

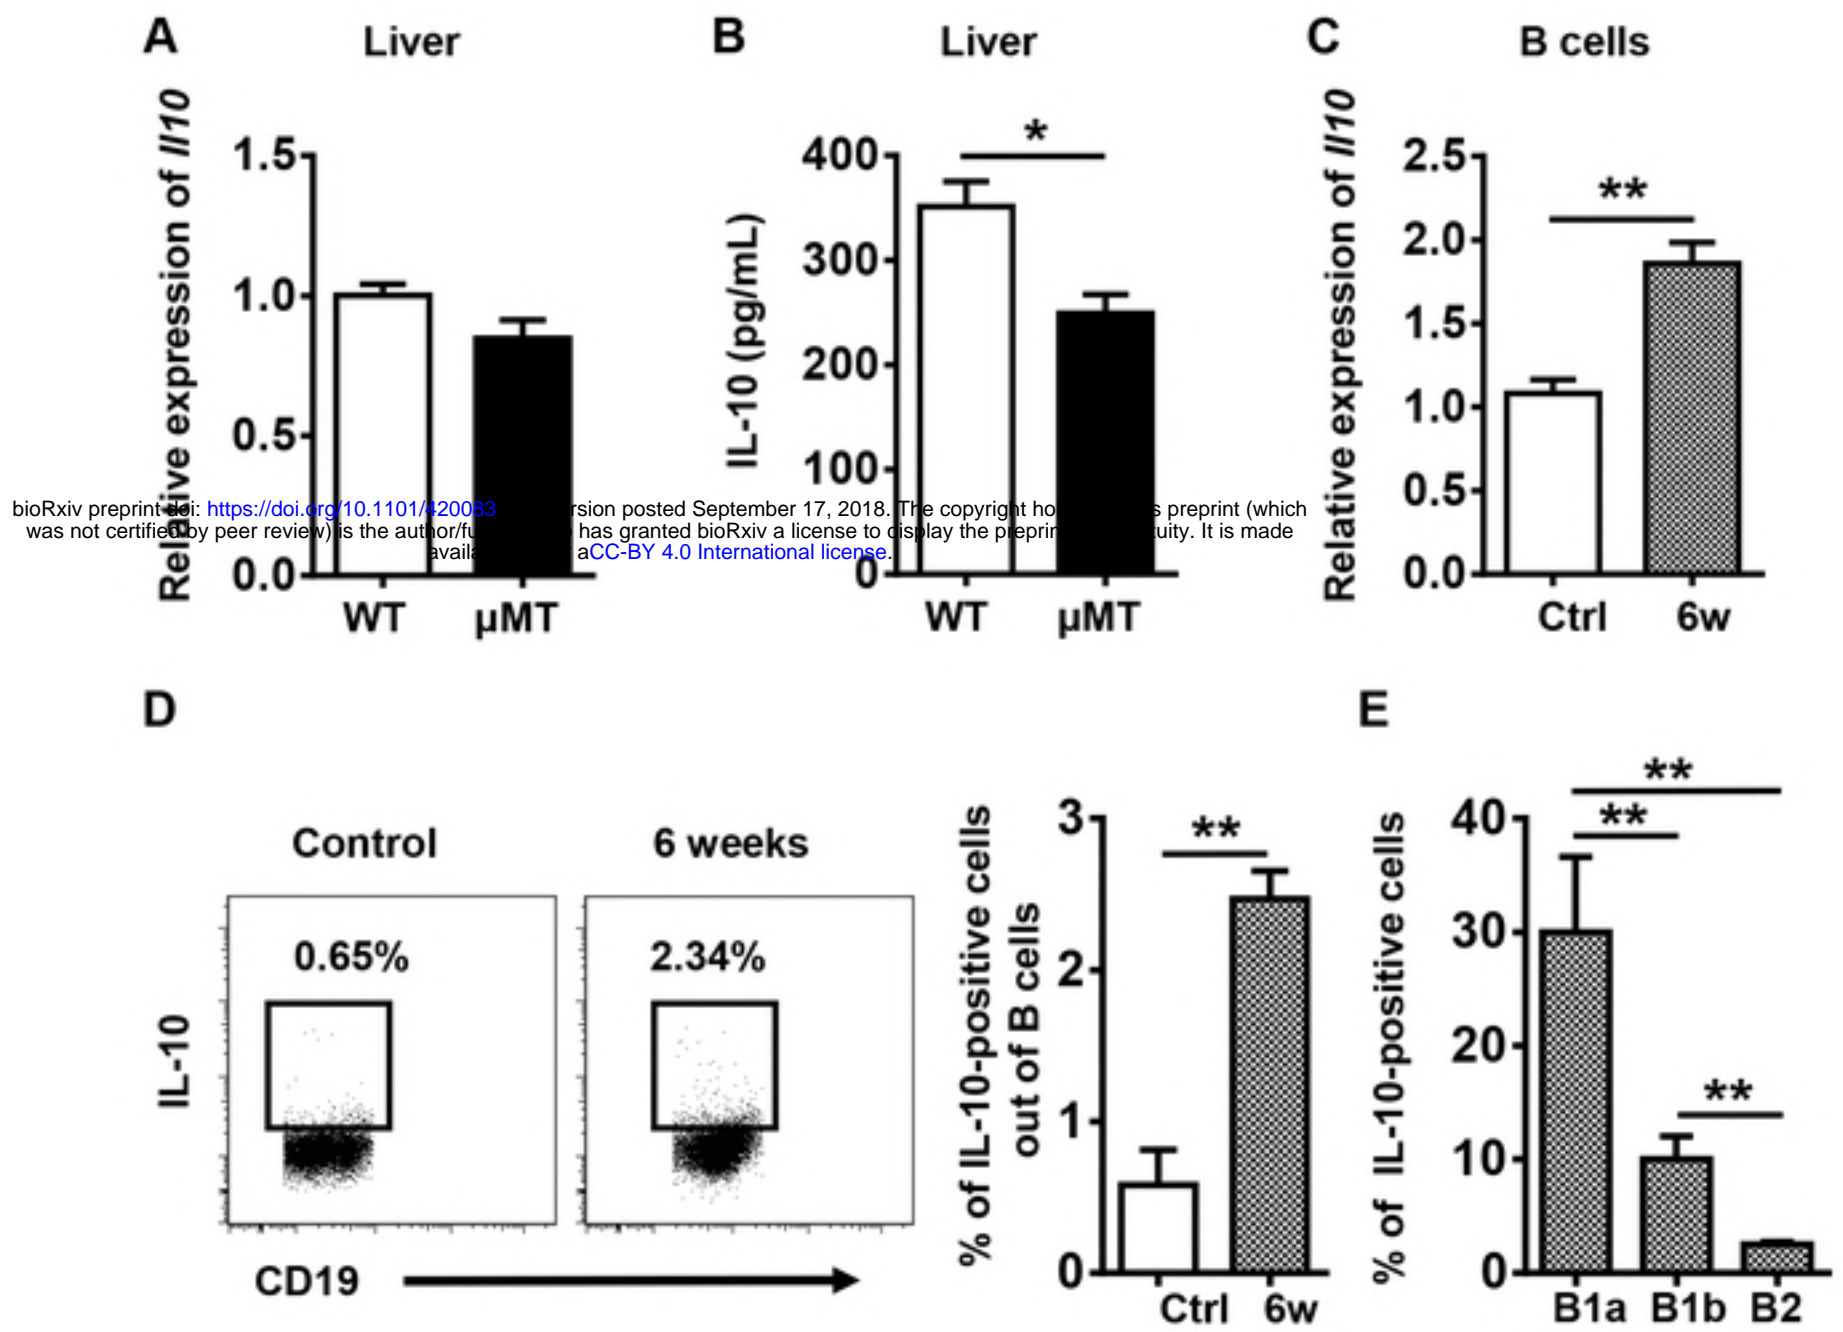

**Fig 7**

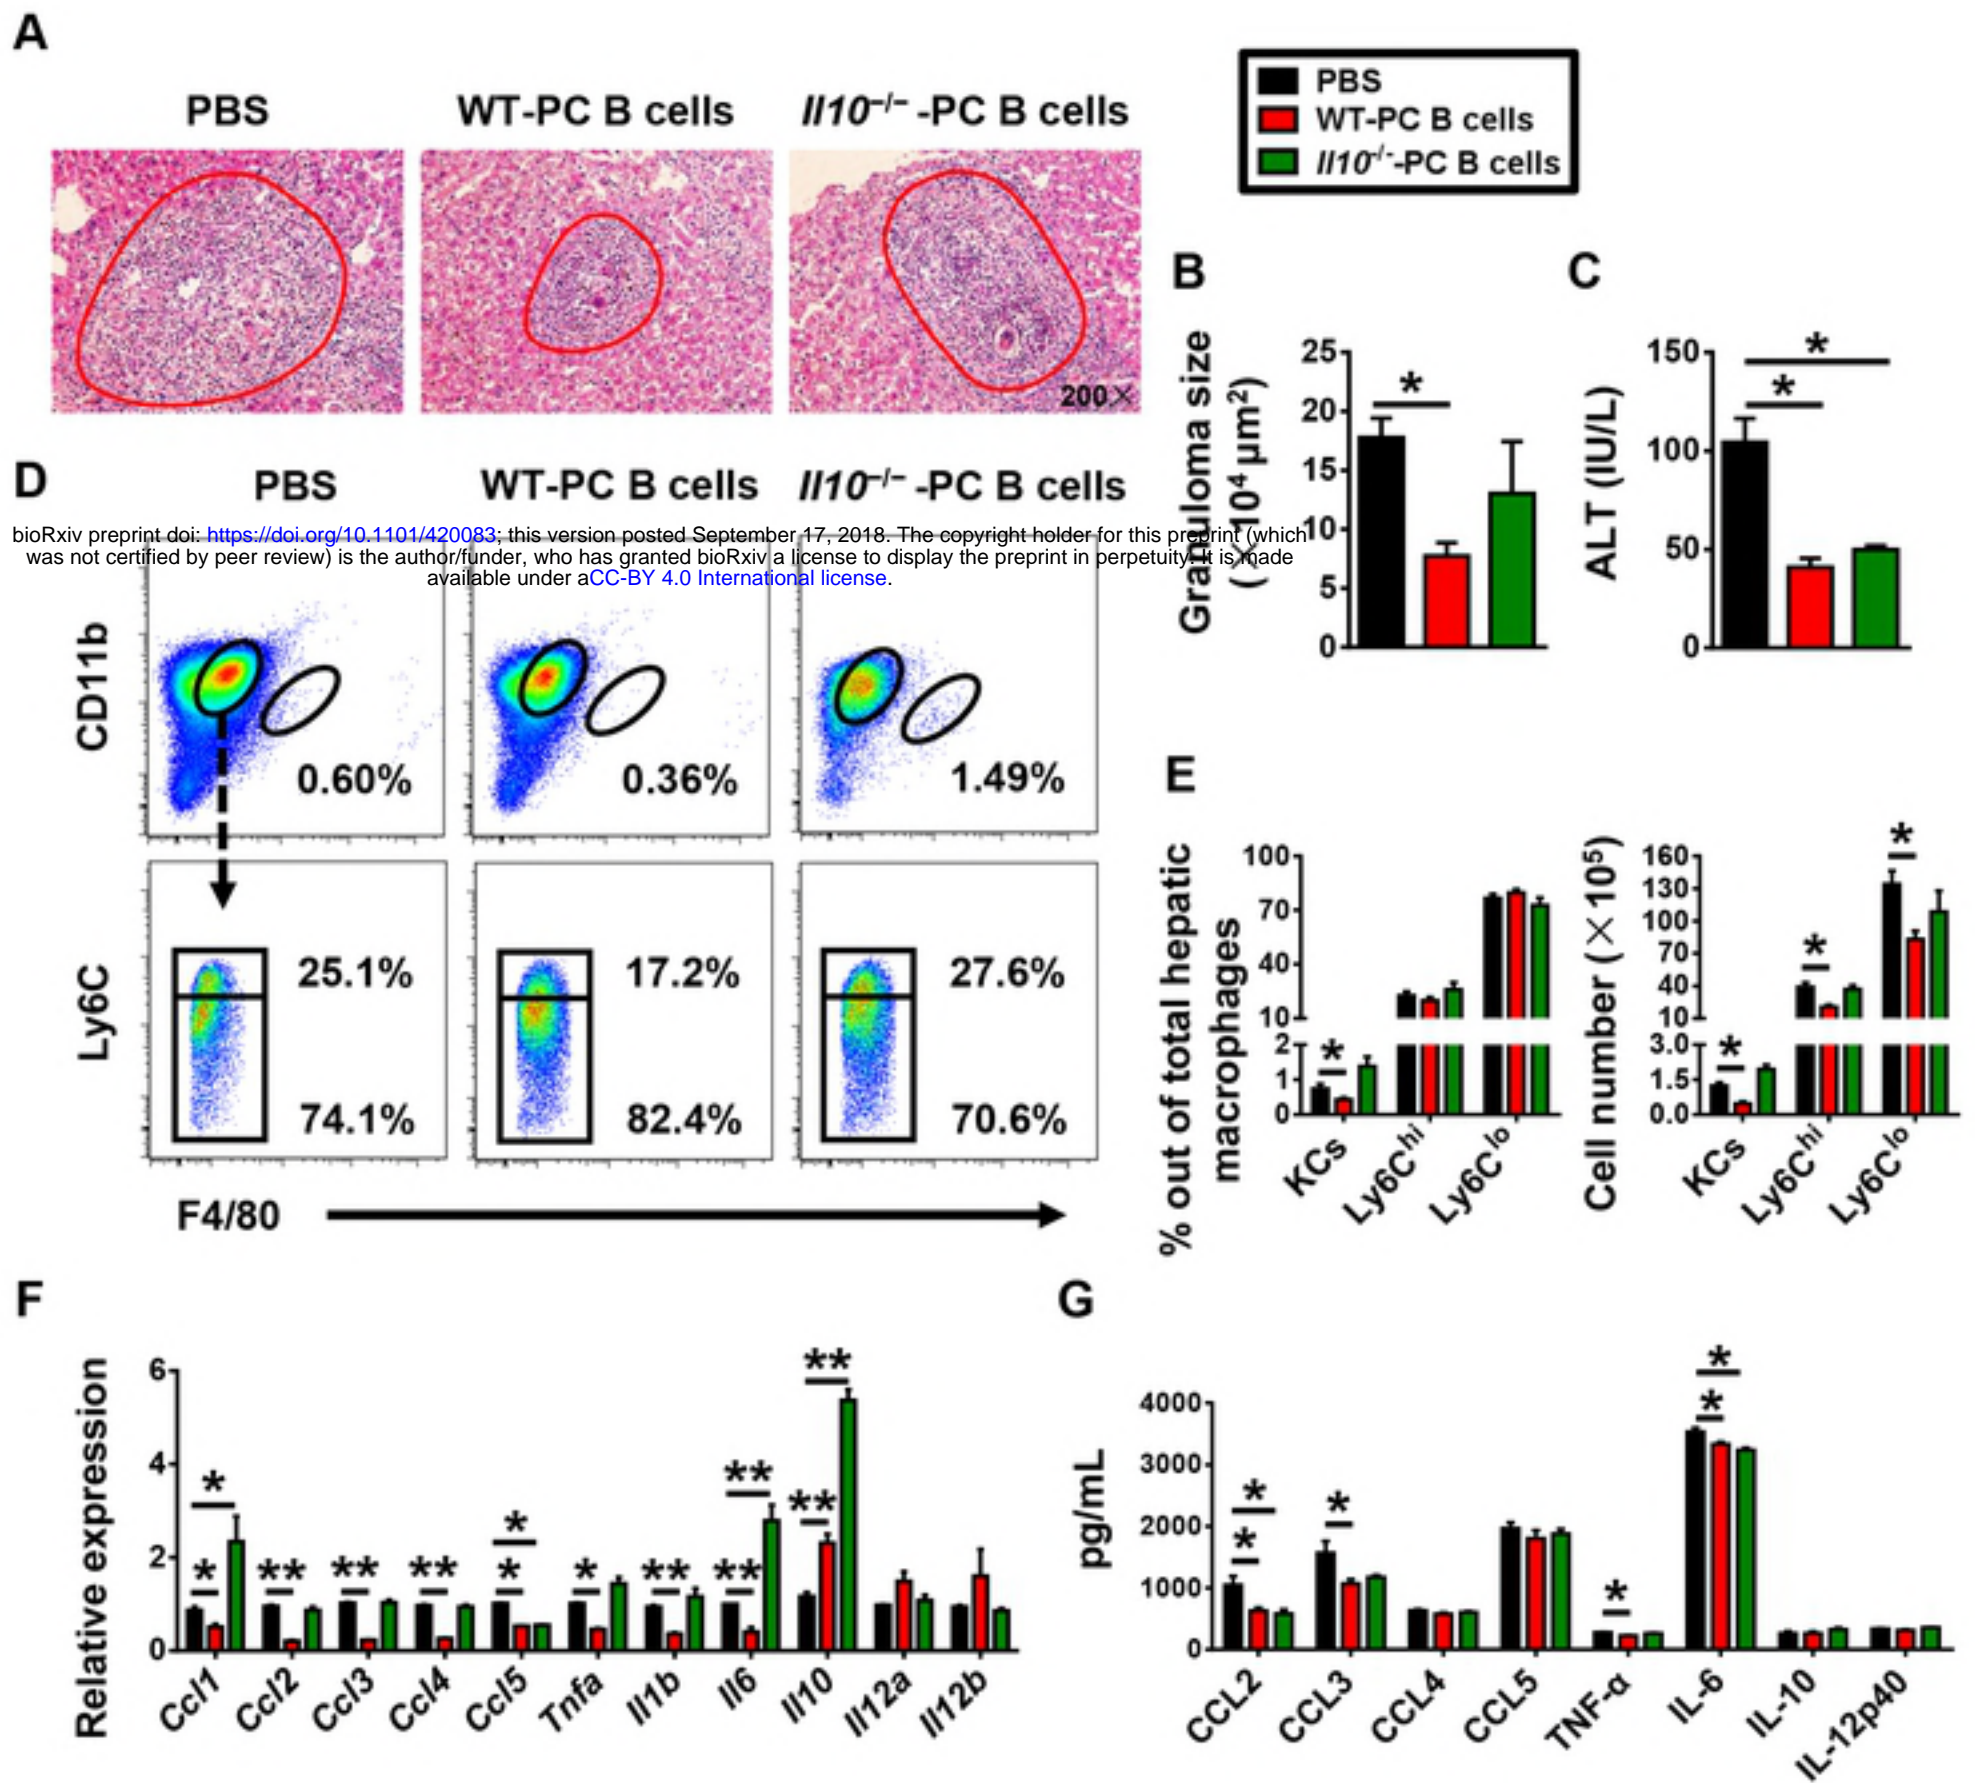

**Fig 8**



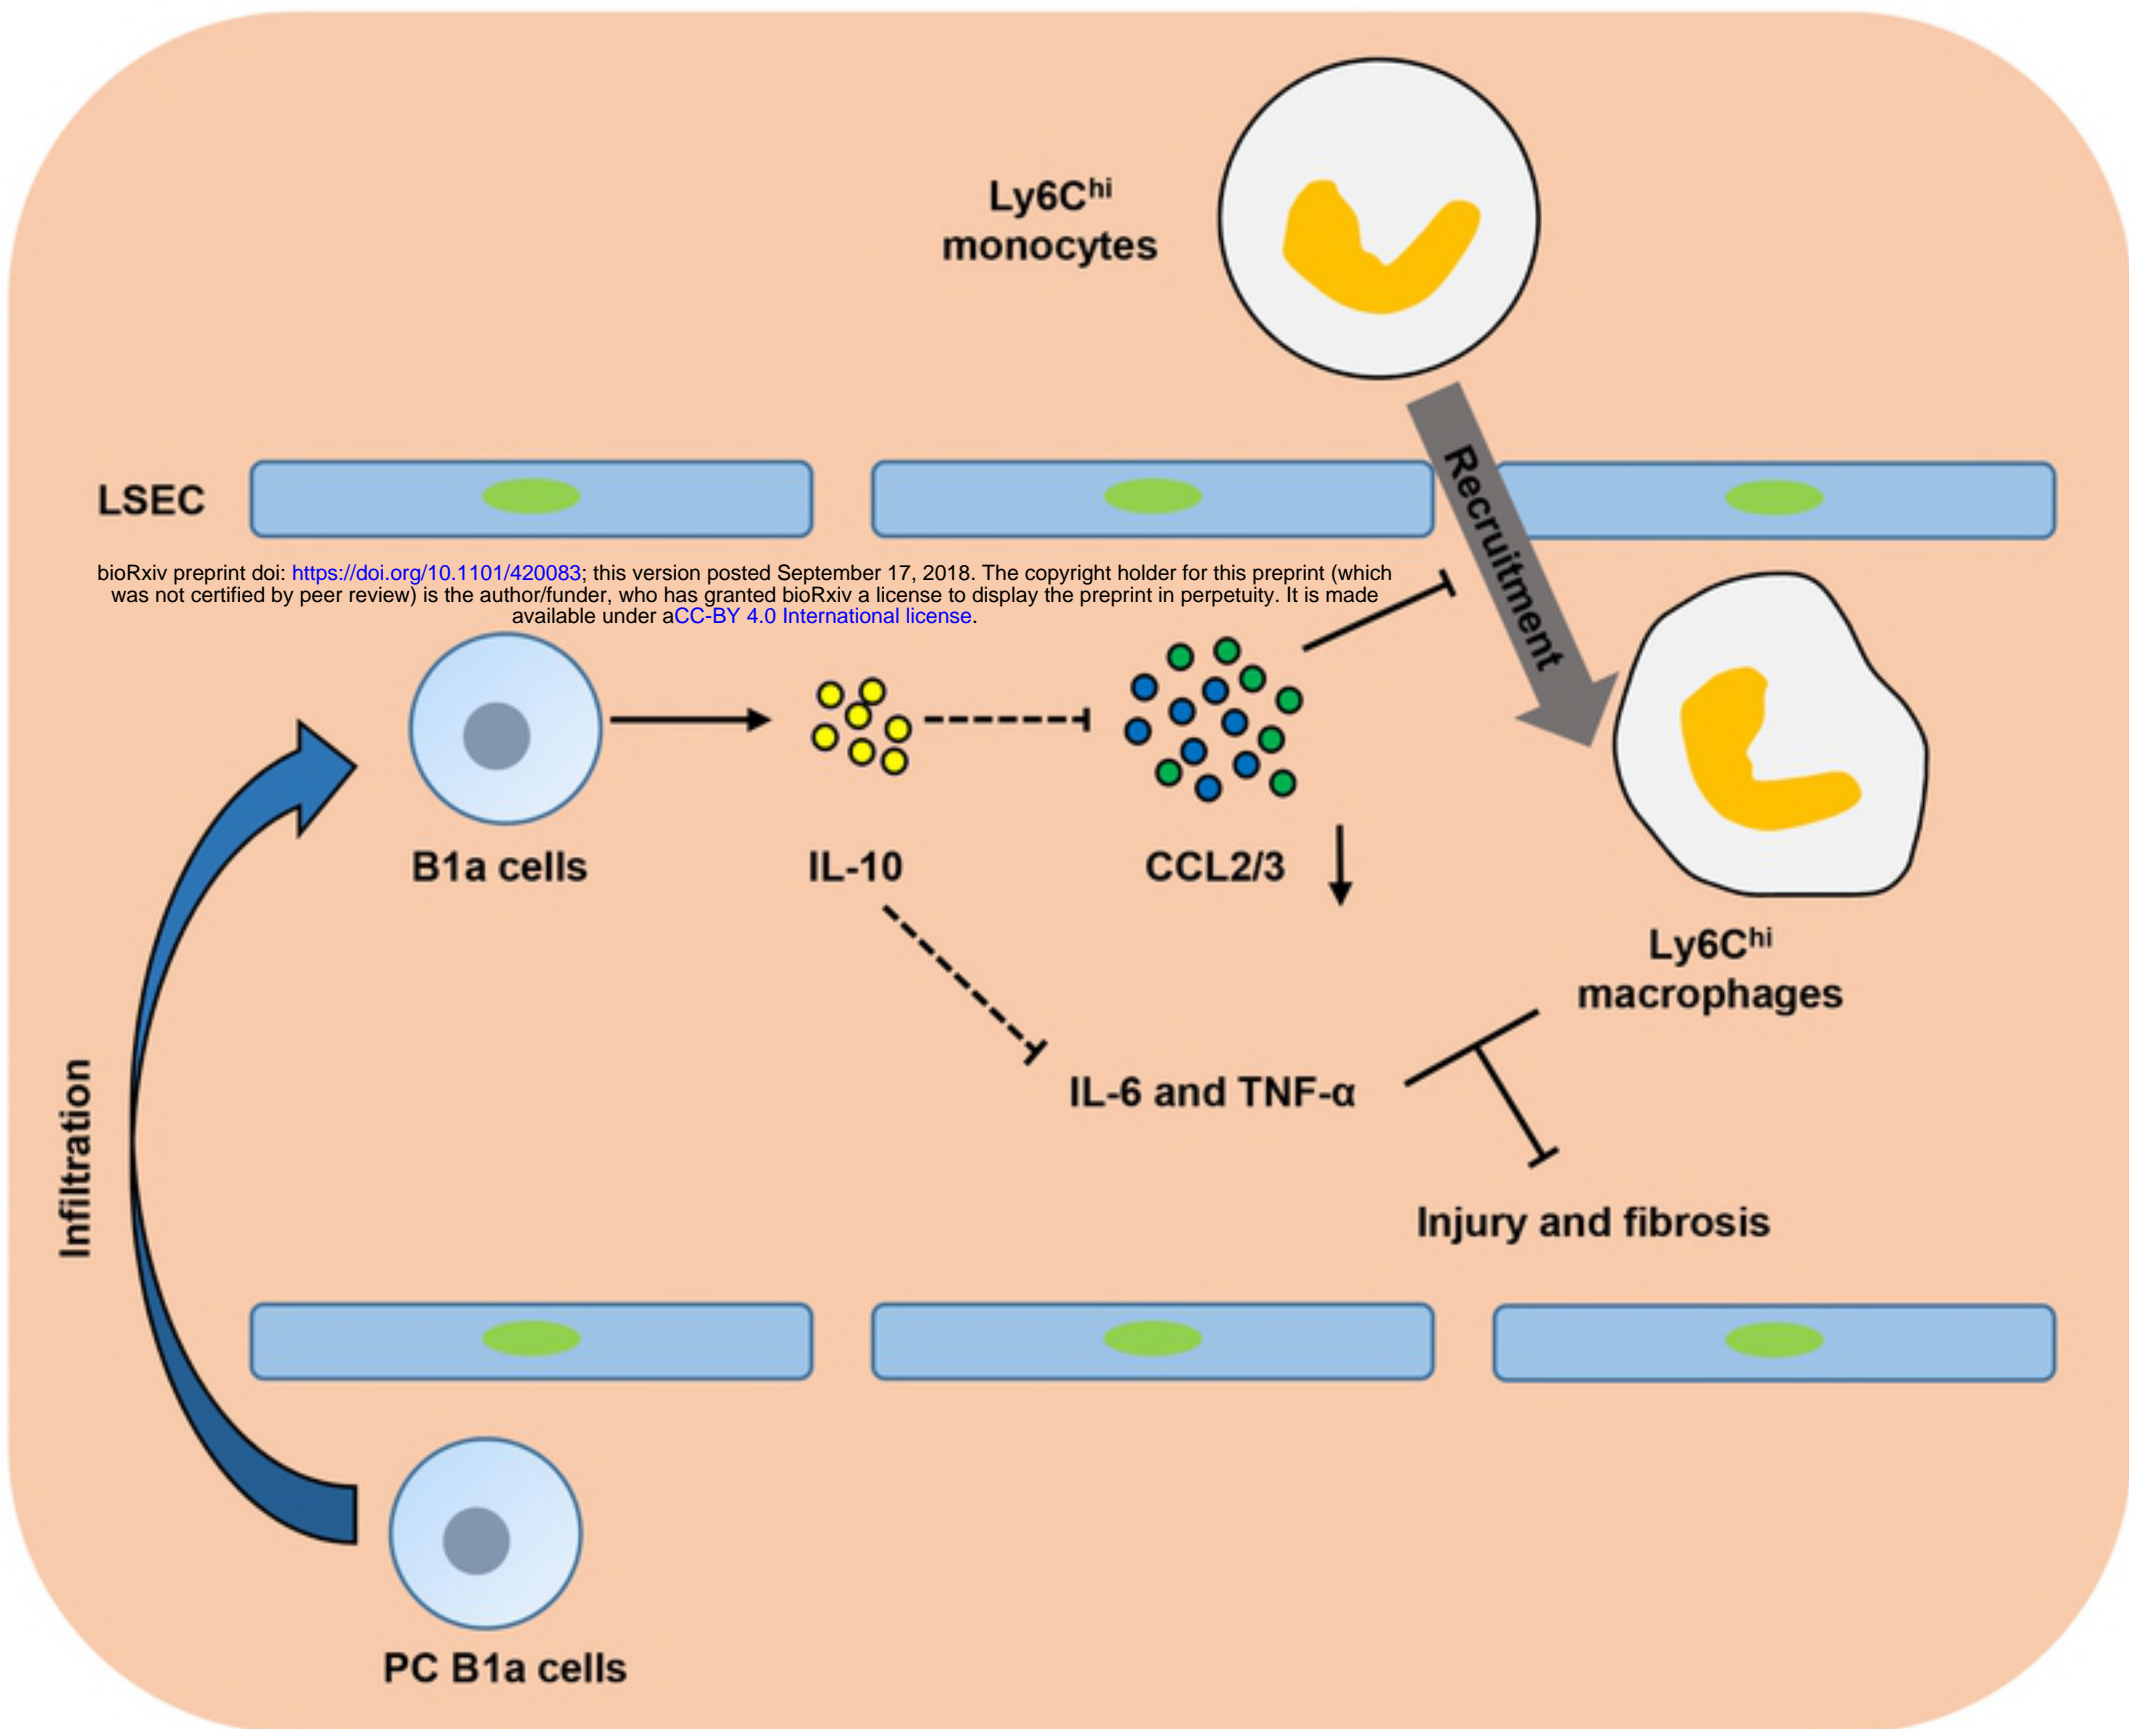

**Fig 9**
